# Supplementary material for: A Comparison of the Oral Microbiota in Healthy Dogs and Dogs with Oral Tumors
Source: MDPI journal article supplement (doi:10.3390/ani13233594), 2023-11-21
Supplement: s1 [file s1]

**Supplementary Table S1.** Questions asked to the owners of the dogs included in the study.

| QUESTION                                        | HEALTHY |     |             |             | ORAL TUMOUR |     |             |             |
|-------------------------------------------------|---------|-----|-------------|-------------|-------------|-----|-------------|-------------|
| Type of food?                                   | Dry     | Wet | Dry and wet | Home-cooked | Dry         | Wet | Dry and wet | Home-cooked |
|                                                 | 11      | 0   | 10          | 2           | 1           | 0   | 5           | 1           |
| Treats?                                         | Yes     |     | No          |             | Yes         |     | No          |             |
|                                                 | 19      |     | 5           |             | 4           |     | 3           |             |
| Vitamins or other supplements?                  | Yes     |     | No          |             | Yes         |     | No          |             |
|                                                 | 6       |     | 18          |             | 2           |     | 5           |             |
| Antiparasitics?                                 | Yes     |     | No          |             | Yes         |     | No          |             |
|                                                 | 24      |     | 0           |             | 0           |     | 7           |             |
| Antibiotics?                                    | Yes     |     | No          |             | Yes         |     | No          |             |
|                                                 | 0       |     | 24          |             | 0           |     | 7           |             |
| Immunosuppressive drugs?                        | Yes     |     | No          |             | Yes         |     | No          |             |
|                                                 | 0       |     | 24          |             | 0           |     | 7           |             |
| Gastroprotectants?                              | Yes     |     | No          |             | Yes         |     | No          |             |
|                                                 | 0       |     | 24          |             | 0           |     | 7           |             |
| Product for oral care containing chlorhexidine? | Yes     |     | No          |             | Yes         |     | No          |             |
|                                                 | 2       |     | 22          |             | 1           |     | 6           |             |
| Previous dental procedure?                      | Yes     |     | No          |             | Yes         |     | No          |             |
|                                                 | 3       |     | 21          |             | 2           |     | 5           |             |
| Do you brush teeth?                             | Yes     |     | No          |             | Yes         |     | No          |             |
|                                                 | 5       |     | 19          |             | 2           |     | 5           |             |
| Other oral care/plaque removal products?        | Yes     |     | No          |             | Yes         |     | No          |             |
|                                                 | 10      |     | 14          |             | 2           |     | 5           |             |
