# Supplementary material for: A Comparison of the Oral Microbiota in Healthy Dogs and Dogs with Oral Tumors
Source: MDPI journal article supplement (doi:10.3390/ani13233594), 2023-11-21

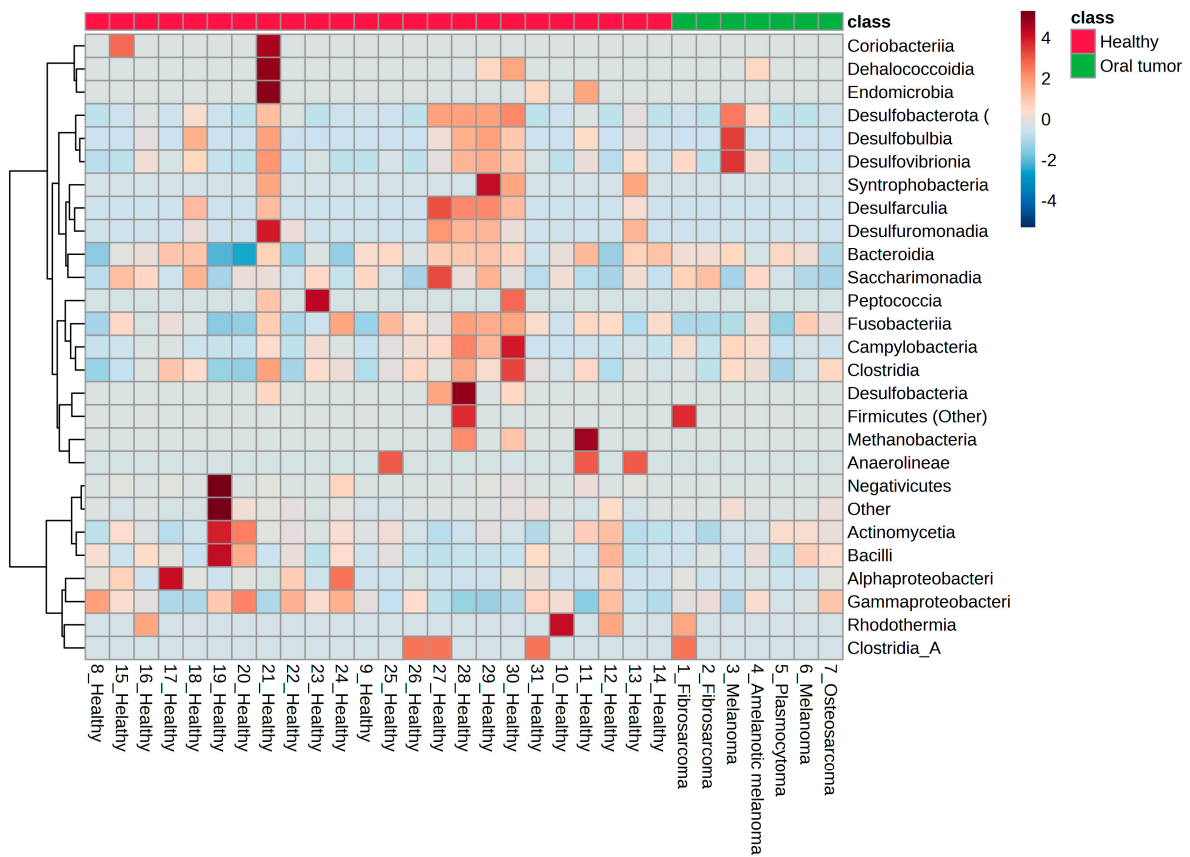

**Figure S1.** Heat map representing the relative abundance of bacterial taxa at class level in healthy dogs and those with oral tumors.

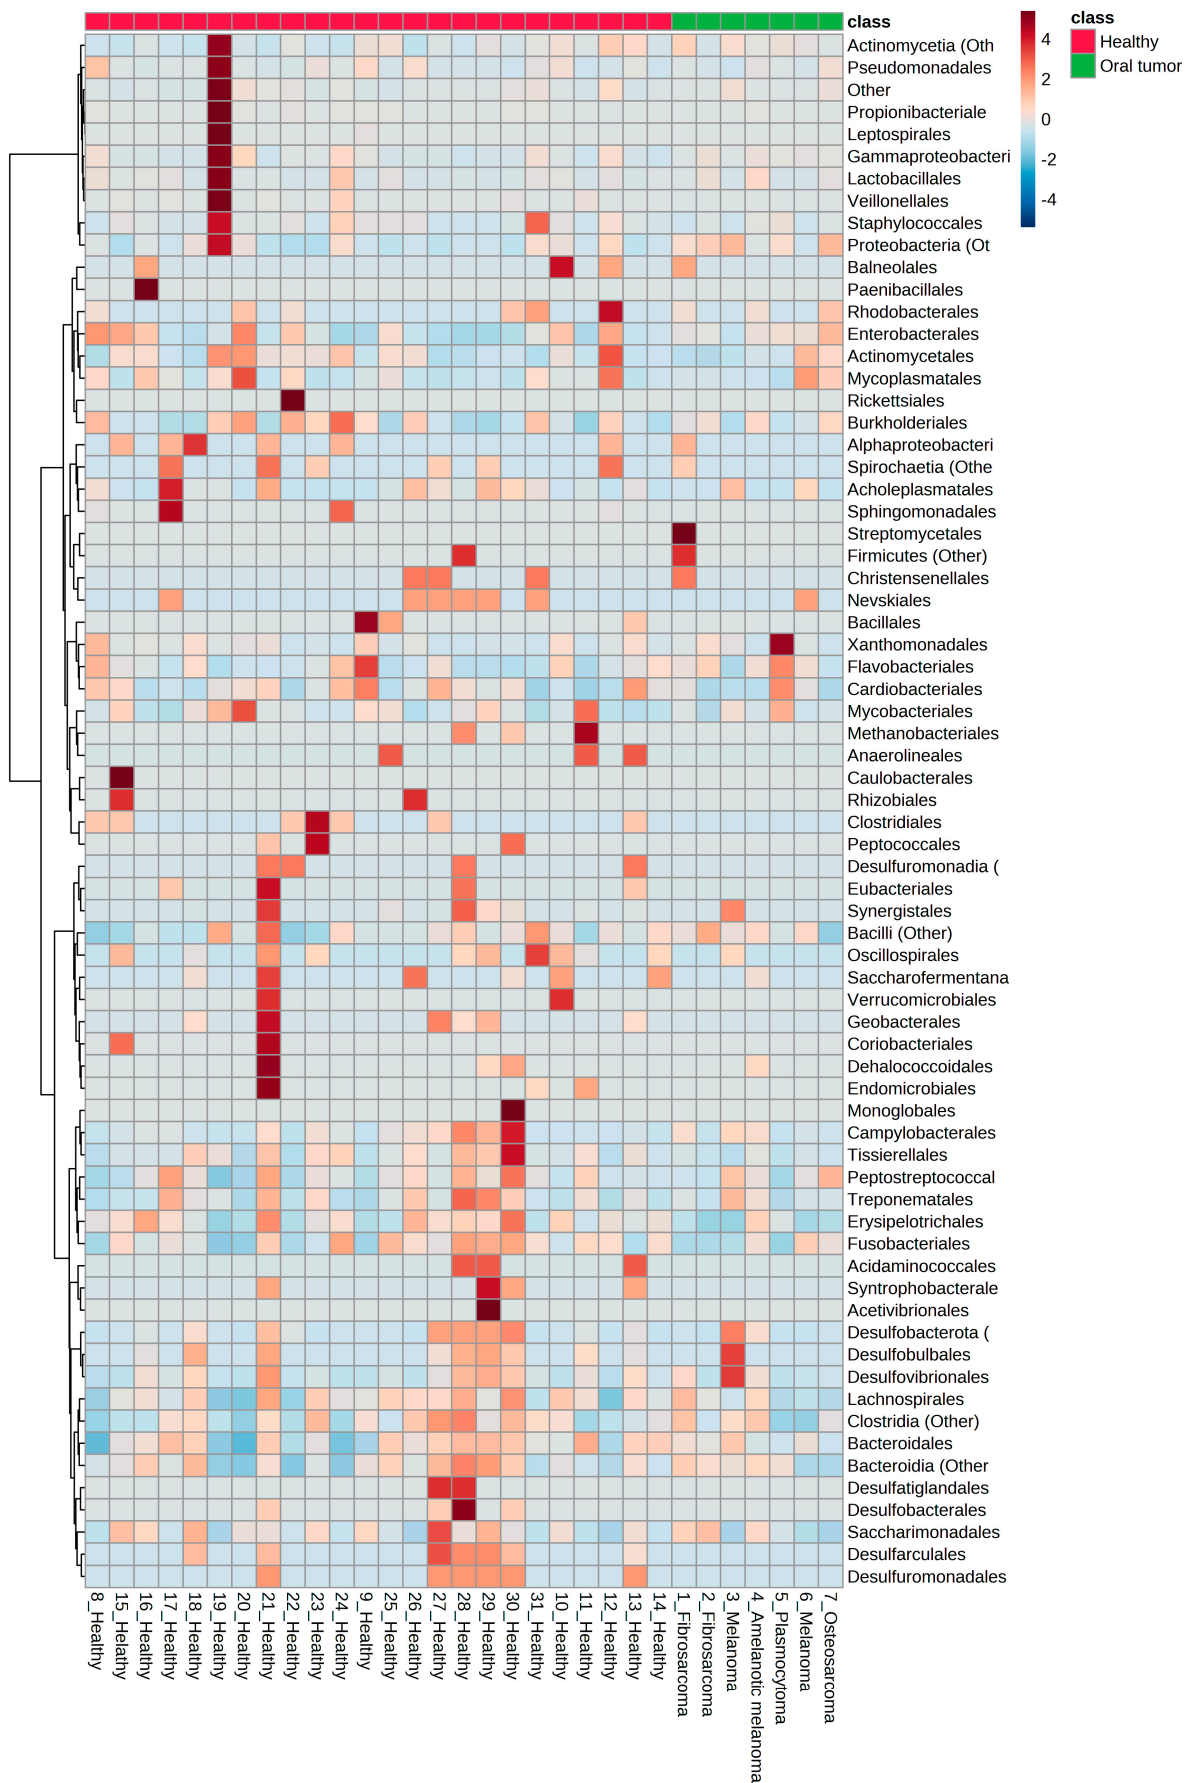

**Figure S2.** Heat map representing the relative abundance of bacterial taxa at order level in healthy dogs and those with oral tumors.

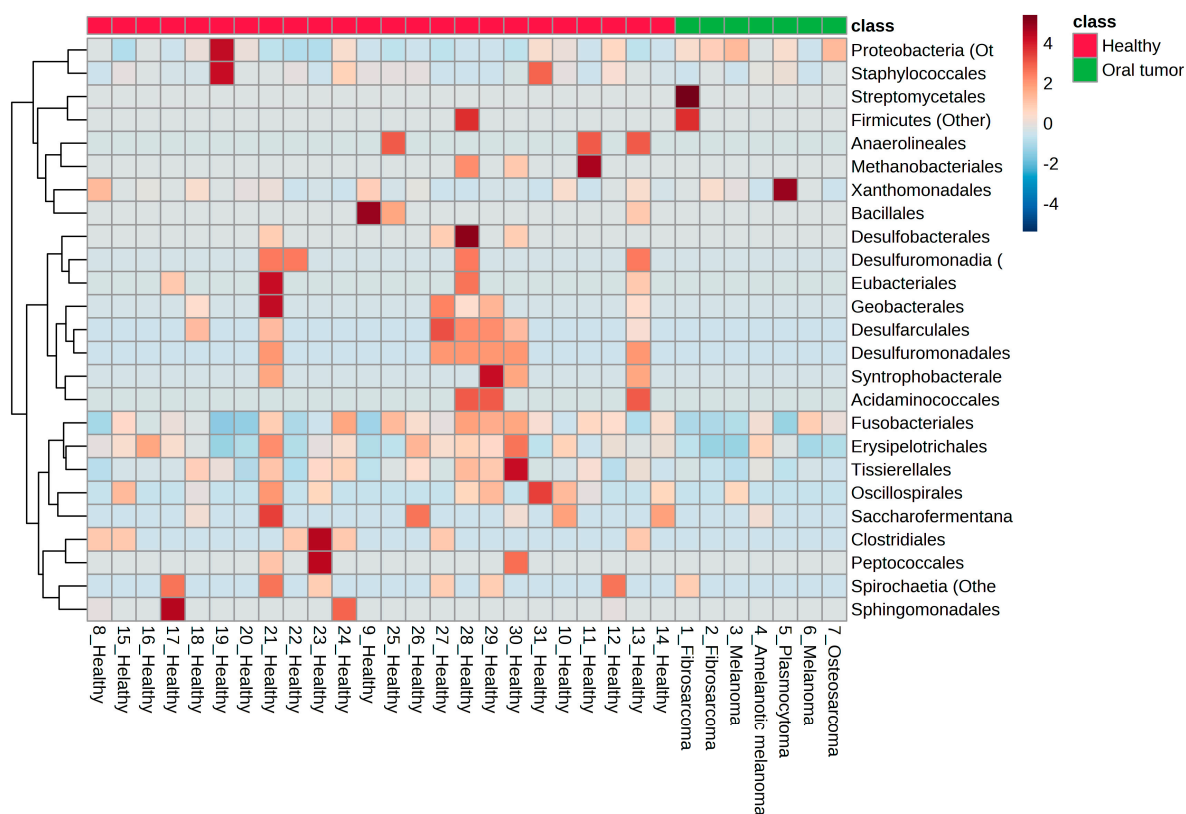

**Figure S3.** Heat map representing the 25 most abundant bacterial taxa at order level in healthy dogs and those with oral tumors.

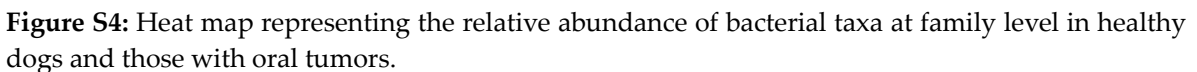

Supplement: s1 [file s1]
