# Supplementary material for: A Comparison of the Oral Microbiota in Healthy Dogs and Dogs with Oral Tumors
Source: MDPI journal article supplement (doi:10.3390/ani13233594), 2023-11-21
Supplement: s1 [file s1]

**Table S2.** Baseline data of all patients included in the study (gender, age, weight).

| PATIENTS                   | BREED                         | SEX | AGE (months) | WEIGHT (kg) |
|----------------------------|-------------------------------|-----|--------------|-------------|
| <b>Healthy</b>             | German Pointer                | M   | 86           | 30          |
|                            | Giant Schnauzer               | F   | 24           | 31          |
|                            | Airedale Terrier              | FS  | 120          | 26          |
|                            | Cavalier King Charles spaniel | FS  | 125          | 7           |
|                            | English Cocker Spaniel        | FS  | 140          | 14          |
|                            | Tibetan terrier               | M   | 77           | 12,5        |
|                            | Whippet                       | MN  | 75           | 17,7        |
|                            | German Spitz                  | M   | 64           | 6,4         |
|                            | Lagotto Romagnolo             | FS  | 60           | 12,5        |
|                            | Beagle                        | FS  | 152          | 27          |
|                            | German Shepherd               | FS  | 72           | 28          |
|                            | Lagotto Romagnolo             | M   | 109          | 20          |
|                            | Russian Greyhound             | M   | 51           | 42          |
|                            | Tibetan terrier               | M   | 172          | 13          |
|                            | Labrador retriever            | F   | 95           | 28          |
|                            | French bulldog                | M   | 94           | 14          |
|                            | French bulldog                | FS  | 93           | 11,8        |
|                            | French bulldog                | FS  | 88           | 13          |
|                            | Keeshond                      | F   | 67           | 16          |
|                            | German Spitz                  | M   | 64           | 5           |
|                            | German Spitz                  | F   | 115          | 5           |
|                            | Pomeranian                    | F   | 63           | 3           |
|                            | German boxer                  | M   | 100          | 30          |
|                            | German boxer                  | M   | 53           | 32          |
| <b>Fibrosarcoma</b>        | Labrador Retriever            | FS  | 130          | 26          |
| <b>Fibrosarcoma</b>        | Cross-breed                   | M   | 81           | 40          |
| <b>Melanoma</b>            | Cross-breed                   | FS  | 65           | 9           |
| <b>Amelanotic melanoma</b> | Chihuahua                     | FS  | 143          | 7           |
| <b>Plasmacytoma</b>        | America Staffordshire Terrier | F   | 90           | 27          |
| <b>Melanoma</b>            | Shih-Tzu                      | F   | 103          | 6           |
| <b>Osteosarcoma</b>        | American Bulldog              | FS  | 86           | 50          |

M= male, MN= male neutered, F= female, FS= female spayed
