# Supplementary material for: A Comparison of the Oral Microbiota in Healthy Dogs and Dogs with Oral Tumors
Source: Animals (Basel). 2023 Nov 21;13(23):3594. doi: 10.3390/ani13233594 (PMC10705671; doi:10.3390/ani13233594)
Supplement: Supplementary file 1 [file animals-13-03594-s001.zip]

Archive with 4 entries (4 files):
- Supplementary Figures.pdf
- Supplementary Table S1.pdf
- Supplementary Table S2.pdf
- Supplementary Table S3.xlsx
