# Supplementary material for: A Comparison of the Oral Microbiota in Healthy Dogs and Dogs with Oral Tumors
Source: Animals (Basel). 2023 Nov 21;13(23):3594. doi: 10.3390/ani13233594 (PMC10705671; doi:10.3390/ani13233594)
Supplement: Supplementary file 1 [file animals-13-03594-s001.zip › Supplementary Table S3.xlsx]

## Sheet: Sheet1
	Phylum		Healthy			Oral Tumor			Healthy vs. Oral Tumor
			Median	Range		Median	Range		P value	Q value
	Actinobacteriota		2.12	0.33-12.52		1.63	0.2-3.56		0.764	0.9081
	Bacteroidota		66.11	15.65-86.72		66.61	45.15-74.66		0.729	0.9081
	Campylobacterota		0.19	0.03-2.58		0.2	0.06-0.75		0.7727	0.9081
	Desulfobacterota		0.8	0.13-4.4		0.59	0.2-6.77		0.6544	0.9081
	Firmicutes		0.78	0.18-11.05		1.4	0.22-3.47		0.764	0.9081
	Firmicutes_A		0.36	0.08-1.13		0.34	0.13-0.51		0.9081	0.9081
	Firmicutes_C		0.01	0-0.54		0	0-0.01		0.0249	0.2988
	Fusobacteriota		0.28	0.01-0.56		0.1	0.04-0.39		0.2534	0.9081
	Bacteria;p__Other		0.2	0.09-5.57		0.26	0.21-0.58		0.1359	0.8154
	Patescibacteria		0.04	0-0.16		0.03	0-0.09		0.6682	0.9081
	Proteobacteria		28.2	4.55-69.34		27.41	12.95-47.07		0.8717	0.9081
	Spirochaetota		0.48	0.03-2.43		0.44	0.07-1.46		0.9081	0.9081
	Class		Healthy			Oral Tumor			Healthy vs. Oral Tumor
			Median	Range		Median	Range		P value	Q value
	Actinomycetia		2.12	0.33-12.52		1.63	0.2-3.56		0.764	0.9081
	Bacteroidia		66.11	15.65-86.72		66.61	45.15-74.66		0.729	0.9081
	Campylobacteria		0.19	0.03-2.58		0.2	0.06-0.75		0.7727	0.9081
	Desulfovibrionia		0.8	0.13-4.35		0.59	0.2-6.71		0.6606	0.9081
	p__Desulfobacterota;c__Other		0	0-0.03		0	0-0.03		0.6442	0.9081
	Bacilli		0.78	0.18-11.05		1.4	0.22-3.47		0.764	0.9081
	Clostridia		0.35	0.08-1.13		0.33	0.13-0.51		0.9081	0.9081
	Negativicutes		0.01	0-0.54		0	0-0.01		0.0249	0.3237
	Fusobacteriia		0.28	0.01-0.56		0.1	0.04-0.39		0.2534	0.9081
	k__Bacteria;p__Other;c__Other		0.2	0.09-5.57		0.26	0.21-0.58		0.1359	0.88335
	Saccharimonadia		0.04	0-0.16		0.03	0-0.09		0.6682	0.9081
	Alphaproteobacteria		0	0-0.05		0	0-0		0.4789	0.9081
	Gammaproteobacteria		28.2	4.55-69.33		27.4	12.94-47.05		0.8717	0.9081
	Order		Healthy			Oral Tumor			Healthy vs. Oral Tumor
			Median	Range		Median	Range		P value	Q value
	Actinomycetales		1.04	0.15-5.29		0.62	0.1-2.98		0.6606	0.983606
	Mycobacteriales		0.76	0.09-4.75		0.73	0.05-2.79		0.9999	0.9999
	c__Actinomycetia;o__Other		0.01	0-0.09		0.01	0.01-0.03		0.0996	0.640671
	Propionibacteriales		0.03	0-5.86		0.04	0-0.05		0.8804	0.983606
	Bacteroidales		54.5	9.63-85.29		49.97	40.78-73.25		0.6606	0.983606
	Flavobacteriales		6.42	1.39-40.59		11.29	1.36-30.55		0.3651	0.983606
	c__Bacteroidia;o__Other		0.04	0.01-0.1		0.05	0.02-0.06		0.7549	0.983606
	Campylobacterales		0.19	0.03-2.58		0.2	0.06-0.75		0.7727	0.983606
	Desulfovibrionales		0.8	0.13-4.35		0.59	0.2-6.71		0.6606	0.983606
	p__Desulfobacterota;c__Other;o__Other		0	0-0.03		0	0-0.03		0.6442	0.983606
	Acholeplasmatales		0.01	0-0.08		0	0-0.03		0.5466	0.983606
	Erysipelotrichales		0.01	0-0.04		0	0-0.02		0.0225	0.3003
	Lactobacillales		0.23	0.08-8.7		0.25	0.05-1.4		0.9538	0.983606
	Mycoplasmatales		0.44	0.05-4.85		0.46	0-3.31		0.8354	0.983606
	c__Bacilli;o__Other		0.01	0-0.02		0.01	0-0.02		0.3783	0.983606
	Staphylococcales		0.08	0.02-0.98		0.08	0.02-0.15		0.5708	0.983606
	Lachnospirales		0.05	0-0.1		0.03	0.02-0.08		0.4936	0.983606
	c__Clostridia;o__Other		0.03	0.01-0.05		0.03	0.01-0.04		0.8625	0.983606
	Peptostreptococcales		0.22	0-0.62		0.22	0.07-0.43		0.9536	0.983606
	Tissierellales		0.05	0-0.37		0.03	0.01-0.06		0.1173	0.640671
	Veillonellales		0.01	0-0.54		0	0-0.01		0.0273	0.3003
	Fusobacteriales		0.28	0.01-0.56		0.1	0.04-0.39		0.2534	0.929133
	k__Bacteria;p__Other;c__Other;o__Other		0.2	0.09-5.57		0.26	0.21-0.58		0.1359	0.640671
	Saccharimonadales		0.04	0-0.16		0.03	0-0.09		0.6682	0.983606
	Rhodobacterales		0	0-0.01		0	0-0		0.6283	0.983606
	Burkholderiales		11.8	1.01-52.18		16.61	6.76-25.29		0.8717	0.983606
	Cardiobacteriales		0.01	0-0.03		0	0-0.03		0.356	0.983606
	Enterobacterales		6.82	2.66-27.98		11.35	6.04-20.69		0.2534	0.929133
	c__Gammaproteobacteria;o__Other		0.06	0.02-0.99		0.09	0.06-0.13		0.1121	0.640671
	Pseudomonadales		0.34	0.07-7.36		0.32	0.06-1		0.6945	0.983606
	Xanthomonadales		0	0-0.03		0	0-0.09		0.6483	0.983606
	p__Proteobacteria;c__Other;o__Other		0	0-0.04		0.01	0-0.02		0.0072	0.2376
	Treponematales		0.47	0.03-2.43		0.44	0.07-1.46		0.9448	0.983606
	Family		Healthy			Oral Tumor			Healthy vs. Oral Tumor
			Median	Range		Median	Range		P value	Q value
	Actinomycetaceae		0.68	0.14-5.27		0.56	0.1-2.97		0.6945	0.994044
	Microbacteriaceae		0	0-1.53		0	0-0.02		0.7817	0.994044
	Micrococcaceae		0	0-1.55		0	0-0.01		0.0695	0.564
	o__Actinomycetales;f__Other		0.01	0-0.27		0.01	0-0.02		0.1263	0.586393
	Mycobacteriaceae		0.76	0.09-4.75		0.73	0.05-2.79		0.9999	0.9999
	c__Actinomycetia;o__Other;f__Other		0.01	0-0.09		0.01	0.01-0.03		0.0996	0.564
	Propionibacteriaceae		0.03	0-5.86		0.04	0-0.05		0.8259	0.994044
	Bacteroidaceae		0.77	0.14-10.15		1.02	0.3-3.53		0.532	0.994044
	Dysgonomonadaceae		0.01	0-0.07		0	0-0.04		0.915	0.999427
	o__Bacteroidales;f__Other		0.54	0.1-1.54		0.67	0.37-0.85		0.9448	0.999427
	Porphyromonadaceae		52.79	9.27-75.59		49.14	39.07-68.44		0.6606	0.994044
	Tannerellaceae		0.33	0.04-0.95		0.34	0.1-0.89		0.9533	0.999427
	Flavobacteriaceae		4.82	1.2-21.73		4.19	1.14-23.28		0.764	0.994044
	o__Flavobacteriales;f__Other		0.05	0.01-0.48		0.08	0.01-0.23		0.2481	0.806325
	Weeksellaceae		1.04	0.1-18.54		6.44	0.21-9.48		0.0473	0.564
	c__Bacteroidia;o__Other;f__Other		0.04	0.01-0.1		0.05	0.02-0.06		0.7549	0.994044
	Arcobacteraceae		0	0-0.24		0.03	0-0.31		0.6962	0.994044
	Campylobacteraceae		0.11	0.01-2.52		0.13	0.01-0.66		0.8625	0.994044
	Helicobacteraceae		0.01	0-0.22		0.02	0-0.11		0.5376	0.994044
	o__Campylobacterales;f__Other		0.01	0-0.03		0	0-0.02		0.7548	0.994044
	Desulfomicrobiaceae		0.8	0.13-4.31		0.58	0.2-6.68		0.6544	0.994044
	Desulfovibrionaceae		0	0-0.04		0	0-0.04		0.5055	0.994044
	o__Desulfovibrionales;f__Other		0	0-0.02		0	0-0.01		0.6724	0.994044
	p__Desulfobacterota;c__Other;o__Other;f__Other		0	0-0.03		0	0-0.03		0.6442	0.994044
	Acholeplasmataceae		0.01	0-0.05		0	0-0.02		0.6565	0.994044
	o__Acholeplasmatales;f__Other		0	0-0.02		0	0-0.01		0.385	0.994044
	Erysipelatoclostridiaceae		0.01	0-0.02		0	0-0.01		0.1085	0.564
	Erysipelotrichaceae		0.01	0-0.02		0	0-0.01		0.0201	0.4355
	Aerococcaceae		0.01	0-0.13		0.01	0-0.02		0.0727	0.564
	Lactobacillaceae		0	0-0.09		0	0-0.02		0.6577	0.994044
	o__Lactobacillales;f__Other		0	0-0.02		0	0-0.01		0.493	0.994044
	Streptococcaceae		0.19	0.05-7.83		0.22	0.02-1.4		0.9747	0.9999
	Metamycoplasmataceae		0.43	0.04-4.76		0.44	0-3.31		0.8287	0.994044
	Mycoplasmoidaceae		0.01	0-0.22		0	0-0.06		0.2454	0.806325
	c__Bacilli;o__Other;f__Other		0.01	0-0.02		0.01	0-0.02		0.6497	0.994044
	Gemellaceae		0.07	0.02-0.7		0.06	0.02-0.11		0.4944	0.994044
	Staphylococcaceae		0	0-0.52		0	0-0.04		0.6894	0.994044
	Lachnospiraceae		0.04	0-0.1		0.03	0.01-0.08		0.5242	0.994044
	c__Clostridia;o__Other;f__Other		0.03	0.01-0.05		0.03	0.01-0.04		0.8261	0.994044
	Anaerovoracaceae		0.01	0-0.03		0.01	0-0.01		0.464	0.994044
	Filifactoraceae		0.12	0-0.35		0.13	0.05-0.3		0.8629	0.994044
	o__Peptostreptococcales;f__Other		0.01	0-0.01		0.01	0-0.01		0.8621	0.994044
	Peptostreptococcaceae		0.06	0-0.43		0.07	0.01-0.29		0.938	0.999427
	Peptoniphilaceae		0.05	0-0.36		0.03	0.01-0.06		0.1123	0.564
	Megasphaeraceae		0	0-0.02		0	0-0.01		0.0658	0.564
	Fusobacteriaceae		0.24	0.01-0.48		0.1	0.04-0.39		0.3858	0.994044
	Leptotrichiaceae		0.02	0-0.16		0	0-0.01		0.0002	0.013
	o__Fusobacteriales;f__Other		0	0-0		0	0-0		0.1004	0.564
	k__Bacteria;p__Other;c__Other;o__Other;f__Other		0.2	0.09-5.57		0.26	0.21-0.58		0.1503	0.6513
	Saccharimonadaceae		0.04	0-0.16		0.03	0-0.09		0.6512	0.994044
	Rhodobacteraceae		0	0-0.01		0	0-0		0.6339	0.994044
	Burkholderiaceae		0.05	0-0.19		0.02	0.01-0.18		0.555	0.994044
	Neisseriaceae		11.66	0.98-52.09		16.54	6.71-25.27		0.8717	0.994044
	o__Burkholderiales;f__Other		0.01	0-0.04		0.02	0.01-0.04		0.2471	0.806325
	Cardiobacteriaceae		0.01	0-0.03		0	0-0.03		0.2103	0.806325
	Enterobacteriaceae		0	0-0.72		0	0-0.01		0.4419	0.994044
	o__Enterobacterales;f__Other		0.02	0-0.07		0.04	0.02-0.04		0.0735	0.564
	Pasteurellaceae		6.34	2.65-27.9		11.31	6.02-20.64		0.2159	0.806325
	c__Gammaproteobacteria;o__Other;f__Other		0.06	0.02-0.99		0.09	0.06-0.13		0.1128	0.564
	Moraxellaceae		0.34	0.07-6.53		0.32	0.06-0.99		0.8354	0.994044
	o__Pseudomonadales;f__Other		0	0-0.03		0	0-0		0.8692	0.994044
	Xanthomonadaceae		0	0-0.03		0	0-0.08		0.8232	0.994044
	p__Proteobacteria;c__Other;o__Other;f__Other		0	0-0.04		0.01	0-0.02		0.0072	0.234
	o__Treponematales;f__Other		0	0-0.01		0	0-0.01		0.9999	0.9999
	Treponemataceae		0.47	0.03-2.43		0.44	0.07-1.45		0.9448	0.999427
	Genus		Healthy			Oral Tumor			Healthy vs. Oral Tumor
			Median	Range		Median	Range		P value	Q value
	k__Bacteria;p__Actinobacteriota;c__Actinomycetia;o__Actinomycetales;f__Actinomycetaceae;g__Actinomyces		0.63	0.01-5.06		0.43	0.03-2.84		0.4392	0.9999
	k__Bacteria;p__Actinobacteriota;c__Actinomycetia;o__Actinomycetales;f__Actinomycetaceae;g__Boudabousia		0	0-0.01		0	0-0.01		0.1246	0.709041
	k__Bacteria;p__Actinobacteriota;c__Actinomycetia;o__Actinomycetales;f__Actinomycetaceae;g__Buchananella		0.09	0-0.44		0.1	0.02-0.56		0.6213	0.9999
	k__Bacteria;p__Actinobacteriota;c__Actinomycetia;o__Actinomycetales;f__Actinomycetaceae;g__Gleimia		0.02	0-0.14		0.03	0-0.2		0.409	0.9999
	k__Bacteria;p__Actinobacteriota;c__Actinomycetia;o__Actinomycetales;f__Actinomycetaceae;g__Other		0	0-0.01		0	0-0.01		0.7429	0.9999
	k__Bacteria;p__Actinobacteriota;c__Actinomycetia;o__Actinomycetales;f__Actinomycetaceae;g__Pauljensenia		0.02	0-0.05		0.01	0-0.03		0.991	0.9999
	k__Bacteria;p__Actinobacteriota;c__Actinomycetia;o__Actinomycetales;f__Microbacteriaceae;g__Other		0	0-0.01		0	0-0.01		0.8373	0.9999
	k__Bacteria;p__Actinobacteriota;c__Actinomycetia;o__Actinomycetales;f__Other;g__Other		0.01	0-0.27		0.01	0-0.02		0.1263	0.709041
	k__Bacteria;p__Actinobacteriota;c__Actinomycetia;o__Mycobacteriales;f__Mycobacteriaceae;g__Corynebacterium		0.73	0.09-4.75		0.73	0.05-2.79		0.9999	0.9999
	k__Bacteria;p__Actinobacteriota;c__Actinomycetia;o__Other;f__Other;g__Other		0.01	0-0.09		0.01	0.01-0.03		0.0996	0.709041
	k__Bacteria;p__Actinobacteriota;c__Actinomycetia;o__Propionibacteriales;f__Propionibacteriaceae;g__Arachnia		0	0-0.07		0	0-0.04		0.0836	0.709041
	k__Bacteria;p__Actinobacteriota;c__Actinomycetia;o__Propionibacteriales;f__Propionibacteriaceae;g__Cutibacterium		0.02	0-5.85		0.01	0-0.04		0.4621	0.9999
	k__Bacteria;p__Actinobacteriota;c__Actinomycetia;o__Propionibacteriales;f__Propionibacteriaceae;g__Other		0	0-0.01		0	0-0.01		0.446	0.9999
	k__Bacteria;p__Bacteroidota;c__Bacteroidia;o__Bacteroidales;f__Bacteroidaceae;g__Alloprevotella		0.01	0-0.04		0.01	0-0.01		0.5371	0.9999
	k__Bacteria;p__Bacteroidota;c__Bacteroidia;o__Bacteroidales;f__Bacteroidaceae;g__Bacteroides		0.18	0.01-9.59		0.3	0.03-3.1		0.417	0.9999
	k__Bacteria;p__Bacteroidota;c__Bacteroidia;o__Bacteroidales;f__Bacteroidaceae;g__F0040		0.02	0-0.13		0.01	0-0.09		0.448	0.9999
	k__Bacteria;p__Bacteroidota;c__Bacteroidia;o__Bacteroidales;f__Bacteroidaceae;g__Other		0.11	0.01-0.26		0.1	0.06-0.45		0.6859	0.9999
	k__Bacteria;p__Bacteroidota;c__Bacteroidia;o__Bacteroidales;f__Bacteroidaceae;g__Phocaeicola		0.01	0-0.06		0.01	0-0.03		0.935	0.9999
	k__Bacteria;p__Bacteroidota;c__Bacteroidia;o__Bacteroidales;f__Bacteroidaceae;g__Prevotella		0.32	0.04-0.7		0.28	0.05-0.49		0.8804	0.9999
	k__Bacteria;p__Bacteroidota;c__Bacteroidia;o__Bacteroidales;f__Bacteroidaceae;g__Prevotellamassilia		0	0-0.01		0	0-0.01		0.291	0.977187
	k__Bacteria;p__Bacteroidota;c__Bacteroidia;o__Bacteroidales;f__Dysgonomonadaceae;g__Fermentimonas		0	0-0.07		0	0-0.04		0.8965	0.9999
	k__Bacteria;p__Bacteroidota;c__Bacteroidia;o__Bacteroidales;f__Other;g__Other		0.54	0.1-1.54		0.67	0.37-0.85		0.9448	0.9999
	k__Bacteria;p__Bacteroidota;c__Bacteroidia;o__Bacteroidales;f__Porphyromonadaceae;g__Other		0.47	0.04-0.83		0.38	0.24-0.63		0.8807	0.9999
	k__Bacteria;p__Bacteroidota;c__Bacteroidia;o__Bacteroidales;f__Porphyromonadaceae;g__Porphyromonas		18.77	3.77-61.68		21.67	9.02-38.76		0.6945	0.9999
	k__Bacteria;p__Bacteroidota;c__Bacteroidia;o__Bacteroidales;f__Porphyromonadaceae;g__Porphyromonas_A		24.41	5.45-47.13		28.8	16.89-33.25		0.7995	0.9999
	k__Bacteria;p__Bacteroidota;c__Bacteroidia;o__Bacteroidales;f__Tannerellaceae;g__Parabacteroides		0	0-0.02		0	0-0.01		0.775	0.9999
	k__Bacteria;p__Bacteroidota;c__Bacteroidia;o__Bacteroidales;f__Tannerellaceae;g__Tannerella		0.32	0.04-0.93		0.34	0.1-0.88		0.9081	0.9999
	k__Bacteria;p__Bacteroidota;c__Bacteroidia;o__Flavobacteriales;f__Flavobacteriaceae;g__Capnocytophaga		4.81	1.2-21.64		4.18	1.14-23.2		0.764	0.9999
	k__Bacteria;p__Bacteroidota;c__Bacteroidia;o__Flavobacteriales;f__Flavobacteriaceae;g__Other		0.01	0-0.05		0.01	0-0.05		0.7706	0.9999
	k__Bacteria;p__Bacteroidota;c__Bacteroidia;o__Flavobacteriales;f__Other;g__Other		0.05	0.01-0.48		0.08	0.01-0.23		0.2481	0.896543
	k__Bacteria;p__Bacteroidota;c__Bacteroidia;o__Flavobacteriales;f__Weeksellaceae;g__Bergeyella		1.01	0.09-18.49		6.4	0.2-9.4		0.0473	0.709041
	k__Bacteria;p__Bacteroidota;c__Bacteroidia;o__Flavobacteriales;f__Weeksellaceae;g__Chryseobacterium		0	0-0.01		0.01	0-0.01		0.9178	0.9999
	k__Bacteria;p__Bacteroidota;c__Bacteroidia;o__Flavobacteriales;f__Weeksellaceae;g__Elizabethkingia		0	0-0		0	0-0		0.4987	0.9999
	k__Bacteria;p__Bacteroidota;c__Bacteroidia;o__Flavobacteriales;f__Weeksellaceae;g__Other		0.01	0-0.04		0.02	0-0.03		0.1035	0.709041
	k__Bacteria;p__Bacteroidota;c__Bacteroidia;o__Flavobacteriales;f__Weeksellaceae;g__Riemerella		0	0-0.01		0.01	0-0.04		0.0267	0.568867
	k__Bacteria;p__Bacteroidota;c__Bacteroidia;o__Other;f__Other;g__Other		0.04	0.01-0.1		0.05	0.02-0.06		0.7549	0.9999
	k__Bacteria;p__Campylobacterota;c__Campylobacteria;o__Campylobacterales;f__Arcobacteraceae;g__Aliarcobacter		0	0-0.22		0.03	0-0.26		0.7643	0.9999
	k__Bacteria;p__Campylobacterota;c__Campylobacteria;o__Campylobacterales;f__Arcobacteraceae;g__Other		0	0-0.03		0	0-0.05		0.3144	0.9999
	k__Bacteria;p__Campylobacterota;c__Campylobacteria;o__Campylobacterales;f__Campylobacteraceae;g__Campylobacter		0.01	0-0.03		0.01	0-0.01		0.6028	0.9999
	k__Bacteria;p__Campylobacterota;c__Campylobacteria;o__Campylobacterales;f__Campylobacteraceae;g__Campylobacter_A		0.08	0-2.44		0.08	0.01-0.59		0.9908	0.9999
	k__Bacteria;p__Campylobacterota;c__Campylobacteria;o__Campylobacterales;f__Campylobacteraceae;g__Campylobacter_B		0	0-0.01		0	0-0.01		0.9956	0.9999
	k__Bacteria;p__Campylobacterota;c__Campylobacteria;o__Campylobacterales;f__Campylobacteraceae;g__Campylobacter_D		0	0-0.01		0	0-0.01		0.8688	0.9999
	k__Bacteria;p__Campylobacterota;c__Campylobacteria;o__Campylobacterales;f__Campylobacteraceae;g__Other		0.02	0-0.1		0.02	0-0.06		0.6022	0.9999
	k__Bacteria;p__Campylobacterota;c__Campylobacteria;o__Campylobacterales;f__Helicobacteraceae;g__Other		0	0-0.06		0.01	0-0.04		0.456	0.9999
	k__Bacteria;p__Campylobacterota;c__Campylobacteria;o__Campylobacterales;f__Helicobacteraceae;g__Wolinella		0.01	0-0.16		0.01	0-0.07		0.6998	0.9999
	k__Bacteria;p__Campylobacterota;c__Campylobacteria;o__Campylobacterales;f__Other;g__Other		0.01	0-0.03		0	0-0.02		0.7548	0.9999
	k__Bacteria;p__Desulfobacterota;c__Desulfovibrionia;o__Desulfovibrionales;f__Desulfomicrobiaceae;g__Desulfomicrobium		0.8	0.13-4.31		0.58	0.2-6.68		0.6544	0.9999
	k__Bacteria;p__Desulfobacterota;c__Desulfovibrionia;o__Desulfovibrionales;f__Desulfovibrionaceae;g__Desulfovibrio		0	0-0.03		0	0-0.03		0.5551	0.9999
	k__Bacteria;p__Desulfobacterota;c__Desulfovibrionia;o__Desulfovibrionales;f__Desulfovibrionaceae;g__Other		0	0-0.01		0	0-0.01		0.4993	0.9999
	k__Bacteria;p__Desulfobacterota;c__Desulfovibrionia;o__Desulfovibrionales;f__Other;g__Other		0	0-0.02		0	0-0.01		0.6724	0.9999
	k__Bacteria;p__Desulfobacterota;c__Other;o__Other;f__Other;g__Other		0	0-0.03		0	0-0.03		0.6442	0.9999
	k__Bacteria;p__Firmicutes;c__Bacilli;o__Acholeplasmatales;f__Acholeplasmataceae;g__Acholeplasma		0	0-0.01		0	0-0		0.9656	0.9999
	k__Bacteria;p__Firmicutes;c__Bacilli;o__Acholeplasmatales;f__Other;g__Other		0	0-0.02		0	0-0.01		0.452	0.9999
	k__Bacteria;p__Firmicutes;c__Bacilli;o__Erysipelotrichales;f__Erysipelatoclostridiaceae;g__Eggerthia		0.01	0-0.02		0	0-0.01		0.2416	0.896543
	k__Bacteria;p__Firmicutes;c__Bacilli;o__Erysipelotrichales;f__Erysipelotrichaceae;g__Bulleidia		0	0-0.01		0	0-0.01		0.0917	0.709041
	k__Bacteria;p__Firmicutes;c__Bacilli;o__Erysipelotrichales;f__Erysipelotrichaceae;g__Other		0	0-0.01		0	0-0		0.1203	0.709041
	k__Bacteria;p__Firmicutes;c__Bacilli;o__Lactobacillales;f__Aerococcaceae;g__Abiotrophia		0	0-0.02		0	0-0.01		0.9836	0.9999
	k__Bacteria;p__Firmicutes;c__Bacilli;o__Lactobacillales;f__Aerococcaceae;g__Granulicatella		0	0-0.13		0	0-0.01		0.1377	0.709041
	k__Bacteria;p__Firmicutes;c__Bacilli;o__Lactobacillales;f__Aerococcaceae;g__Other		0	0-0.02		0	0-0.01		0.4909	0.9999
	k__Bacteria;p__Firmicutes;c__Bacilli;o__Lactobacillales;f__Lactobacillaceae;g__Weissella		0	0-0.02		0	0-0.02		0.3936	0.9999
	k__Bacteria;p__Firmicutes;c__Bacilli;o__Lactobacillales;f__Other;g__Other		0	0-0.02		0	0-0.01		0.7174	0.9999
	k__Bacteria;p__Firmicutes;c__Bacilli;o__Lactobacillales;f__Streptococcaceae;g__Other		0	0-0		0	0-0		0.0619	0.709041
	k__Bacteria;p__Firmicutes;c__Bacilli;o__Lactobacillales;f__Streptococcaceae;g__Streptococcus		0.19	0.05-7.83		0.22	0.02-1.4		0.9539	0.9999
	k__Bacteria;p__Firmicutes;c__Bacilli;o__Mycoplasmatales;f__Metamycoplasmataceae;g__Mesomycoplasma		0.02	0-1.26		0	0-1.63		0.3665	0.9999
	k__Bacteria;p__Firmicutes;c__Bacilli;o__Mycoplasmatales;f__Metamycoplasmataceae;g__Metamycoplasma		0.01	0-0.16		0	0-0.2		0.1854	0.795837
	k__Bacteria;p__Firmicutes;c__Bacilli;o__Mycoplasmatales;f__Metamycoplasmataceae;g__Mycoplasmopsis		0	0-0.04		0	0-0.03		0.1729	0.78546
	k__Bacteria;p__Firmicutes;c__Bacilli;o__Mycoplasmatales;f__Metamycoplasmataceae;g__Mycoplasmopsis_A		0.32	0.03-4.05		0.24	0-3.1		0.8287	0.9999
	k__Bacteria;p__Firmicutes;c__Bacilli;o__Mycoplasmatales;f__Metamycoplasmataceae;g__Other		0	0-0.08		0.01	0-0.05		0.467	0.9999
	k__Bacteria;p__Firmicutes;c__Bacilli;o__Mycoplasmatales;f__Mycoplasmoidaceae;g__Ureaplasma		0.01	0-0.21		0	0-0.06		0.225	0.888073
	k__Bacteria;p__Firmicutes;c__Bacilli;o__Other;f__Other;g__Other		0.01	0-0.02		0.01	0-0.02		0.3783	0.9999
	k__Bacteria;p__Firmicutes;c__Bacilli;o__Staphylococcales;f__Gemellaceae;g__Gemella		0.07	0.02-0.7		0.06	0.02-0.11		0.4943	0.9999
	k__Bacteria;p__Firmicutes;c__Bacilli;o__Staphylococcales;f__Staphylococcaceae;g__Staphylococcus		0	0-0.52		0	0-0.03		0.5593	0.9999
	k__Bacteria;p__Firmicutes_A;c__Clostridia;o__Lachnospirales;f__Lachnospiraceae;g__Blautia_A		0	0-0		0	0-0		0.9823	0.9999
	k__Bacteria;p__Firmicutes_A;c__Clostridia;o__Lachnospirales;f__Lachnospiraceae;g__Catonella		0	0-0.02		0	0-0.02		0.1902	0.795837
	k__Bacteria;p__Firmicutes_A;c__Clostridia;o__Lachnospirales;f__Lachnospiraceae;g__Johnsonella		0	0-0.02		0	0-0.02		0.9358	0.9999
	k__Bacteria;p__Firmicutes_A;c__Clostridia;o__Lachnospirales;f__Lachnospiraceae;g__Lachnoanaerobaculum		0.01	0-0.02		0.01	0-0.01		0.3888	0.9999
	k__Bacteria;p__Firmicutes_A;c__Clostridia;o__Lachnospirales;f__Lachnospiraceae;g__Oribacterium		0	0-0.01		0	0-0.01		0.4187	0.9999
	k__Bacteria;p__Firmicutes_A;c__Clostridia;o__Lachnospirales;f__Lachnospiraceae;g__Other		0.01	0-0.03		0.01	0-0.03		0.7375	0.9999
	k__Bacteria;p__Firmicutes_A;c__Clostridia;o__Lachnospirales;f__Lachnospiraceae;g__Stomatobaculum		0	0-0.01		0	0-0.02		0.9999	0.9999
	k__Bacteria;p__Firmicutes_A;c__Clostridia;o__Other;f__Other;g__Other		0.03	0.01-0.05		0.03	0.01-0.04		0.8625	0.9999
	k__Bacteria;p__Firmicutes_A;c__Clostridia;o__Peptostreptococcales;f__Anaerovoracaceae;g__Mogibacterium		0.01	0-0.03		0.01	0-0.01		0.937	0.9999
	k__Bacteria;p__Firmicutes_A;c__Clostridia;o__Peptostreptococcales;f__Anaerovoracaceae;g__Other		0	0-0.01		0	0-0		0.9042	0.9999
	k__Bacteria;p__Firmicutes_A;c__Clostridia;o__Peptostreptococcales;f__Filifactoraceae;g__Acetoanaerobium		0	0-0.01		0	0-0.01		0.5076	0.9999
	k__Bacteria;p__Firmicutes_A;c__Clostridia;o__Peptostreptococcales;f__Filifactoraceae;g__Criibacterium		0.01	0-0.01		0	0-0.01		0.6319	0.9999
	k__Bacteria;p__Firmicutes_A;c__Clostridia;o__Peptostreptococcales;f__Filifactoraceae;g__Filifactor		0.08	0-0.29		0.08	0.04-0.29		0.7029	0.9999
	k__Bacteria;p__Firmicutes_A;c__Clostridia;o__Peptostreptococcales;f__Filifactoraceae;g__Peptoanaerobacter		0.02	0-0.06		0.01	0-0.03		0.2282	0.888073
	k__Bacteria;p__Firmicutes_A;c__Clostridia;o__Peptostreptococcales;f__Other;g__Other		0.01	0-0.01		0.01	0-0.01		0.7711	0.9999
	k__Bacteria;p__Firmicutes_A;c__Clostridia;o__Peptostreptococcales;f__Peptostreptococcaceae;g__Other		0	0-0.01		0	0-0		0.8778	0.9999
	k__Bacteria;p__Firmicutes_A;c__Clostridia;o__Peptostreptococcales;f__Peptostreptococcaceae;g__Peptostreptococcus		0.06	0-0.42		0.07	0.01-0.28		0.899	0.9999
	k__Bacteria;p__Firmicutes_A;c__Clostridia;o__Tissierellales;f__Peptoniphilaceae;g__Anaerococcus		0	0-0.02		0	0-0		0.0168	0.568867
	k__Bacteria;p__Firmicutes_A;c__Clostridia;o__Tissierellales;f__Peptoniphilaceae;g__Anaerosphaera		0.01	0-0.24		0.02	0-0.02		0.8979	0.9999
	k__Bacteria;p__Firmicutes_A;c__Clostridia;o__Tissierellales;f__Peptoniphilaceae;g__Other		0.01	0-0.03		0.01	0-0.01		0.9586	0.9999
	k__Bacteria;p__Firmicutes_A;c__Clostridia;o__Tissierellales;f__Peptoniphilaceae;g__Parvimonas		0.01	0-0.08		0	0-0.02		0.0608	0.709041
	k__Bacteria;p__Firmicutes_A;c__Clostridia;o__Tissierellales;f__Peptoniphilaceae;g__Peptoniphilus		0.01	0-0.03		0.01	0-0.02		0.4334	0.9999
	k__Bacteria;p__Firmicutes_A;c__Clostridia;o__Tissierellales;f__Peptoniphilaceae;g__Peptoniphilus_A		0	0-0.04		0	0-0		0.1427	0.709041
	k__Bacteria;p__Firmicutes_C;c__Negativicutes;o__Veillonellales;f__Megasphaeraceae;g__28L		0	0-0.02		0	0-0.01		0.0662	0.709041
	k__Bacteria;p__Fusobacteriota;c__Fusobacteriia;o__Fusobacteriales;f__Fusobacteriaceae;g__Fusobacterium		0.21	0.01-0.43		0.07	0.04-0.35		0.4511	0.9999
	k__Bacteria;p__Fusobacteriota;c__Fusobacteriia;o__Fusobacteriales;f__Fusobacteriaceae;g__Fusobacterium_A		0	0-0.01		0	0-0		0.0219	0.568867
	k__Bacteria;p__Fusobacteriota;c__Fusobacteriia;o__Fusobacteriales;f__Fusobacteriaceae;g__Fusobacterium_C		0.02	0-0.04		0.02	0-0.03		0.8072	0.9999
	k__Bacteria;p__Fusobacteriota;c__Fusobacteriia;o__Fusobacteriales;f__Fusobacteriaceae;g__Other		0	0-0.01		0	0-0		0.0319	0.568867
	k__Bacteria;p__Fusobacteriota;c__Fusobacteriia;o__Fusobacteriales;f__Leptotrichiaceae;g__Other		0	0-0.04		0	0-0		0.1217	0.709041
	k__Bacteria;p__Fusobacteriota;c__Fusobacteriia;o__Fusobacteriales;f__Leptotrichiaceae;g__Streptobacillus		0.01	0-0.15		0	0-0		0.0004	0.0636
	k__Bacteria;p__Fusobacteriota;c__Fusobacteriia;o__Fusobacteriales;f__Other;g__Other		0	0-0		0	0-0		0.0908	0.709041
	k__Bacteria;p__Other;c__Other;o__Other;f__Other;g__Other		0.2	0.09-5.57		0.26	0.21-0.58		0.1359	0.709041
	k__Bacteria;p__Patescibacteria;c__Saccharimonadia;o__Saccharimonadales;f__Saccharimonadaceae;g__TM7x		0.04	0-0.16		0.03	0-0.09		0.6682	0.9999
	k__Bacteria;p__Proteobacteria;c__Alphaproteobacteria;o__Rhodobacterales;f__Rhodobacteraceae;g__Roseovarius		0	0-0.01		0	0-0		0.6283	0.9999
	k__Bacteria;p__Proteobacteria;c__Gammaproteobacteria;o__Burkholderiales;f__Burkholderiaceae;g__Acidovorax		0	0-0		0	0-0		0.0494	0.709041
	k__Bacteria;p__Proteobacteria;c__Gammaproteobacteria;o__Burkholderiales;f__Burkholderiaceae;g__Lampropedia		0.01	0-0.06		0	0-0.05		0.5366	0.9999
	k__Bacteria;p__Proteobacteria;c__Gammaproteobacteria;o__Burkholderiales;f__Burkholderiaceae;g__Lautropia		0	0-0.06		0	0-0.02		0.4822	0.9999
	k__Bacteria;p__Proteobacteria;c__Gammaproteobacteria;o__Burkholderiales;f__Burkholderiaceae;g__Other		0.02	0-0.07		0.02	0.01-0.04		0.808	0.9999
	k__Bacteria;p__Proteobacteria;c__Gammaproteobacteria;o__Burkholderiales;f__Burkholderiaceae;g__Ottowia		0	0-0.03		0	0-0.01		0.7383	0.9999
	k__Bacteria;p__Proteobacteria;c__Gammaproteobacteria;o__Burkholderiales;f__Neisseriaceae;g__Alysiella		0.01	0-0.05		0.01	0-0.04		0.1608	0.774764
	k__Bacteria;p__Proteobacteria;c__Gammaproteobacteria;o__Burkholderiales;f__Neisseriaceae;g__Conchiformibius		6.21	0.65-40.7		11.04	3.51-22.58		0.295	0.977187
	k__Bacteria;p__Proteobacteria;c__Gammaproteobacteria;o__Burkholderiales;f__Neisseriaceae;g__Eikenella		0.37	0.07-3.2		0.26	0.02-1.62		0.2688	0.929113
	k__Bacteria;p__Proteobacteria;c__Gammaproteobacteria;o__Burkholderiales;f__Neisseriaceae;g__Kingella_A		0	0-0.02		0.01	0-0.02		0.022	0.568867
	k__Bacteria;p__Proteobacteria;c__Gammaproteobacteria;o__Burkholderiales;f__Neisseriaceae;g__Neisseria		4.65	0.25-25.11		1.63	0.46-12.23		0.1393	0.709041
	k__Bacteria;p__Proteobacteria;c__Gammaproteobacteria;o__Burkholderiales;f__Neisseriaceae;g__Other		0.14	0.01-0.53		0.15	0.11-0.21		0.8263	0.9999
	k__Bacteria;p__Proteobacteria;c__Gammaproteobacteria;o__Burkholderiales;f__Neisseriaceae;g__Vitreoscilla		0	0-0.01		0	0-0.01		0.8495	0.9999
	k__Bacteria;p__Proteobacteria;c__Gammaproteobacteria;o__Burkholderiales;f__Other;g__Other		0.01	0-0.04		0.02	0.01-0.04		0.1682	0.78546
	k__Bacteria;p__Proteobacteria;c__Gammaproteobacteria;o__Cardiobacteriales;f__Cardiobacteriaceae;g__Cardiobacterium		0	0-0.01		0	0-0.01		0.2472	0.896543
	k__Bacteria;p__Proteobacteria;c__Gammaproteobacteria;o__Cardiobacteriales;f__Cardiobacteriaceae;g__Dichelobacter		0	0-0.01		0	0-0.01		0.581	0.9999
	k__Bacteria;p__Proteobacteria;c__Gammaproteobacteria;o__Cardiobacteriales;f__Cardiobacteriaceae;g__Other		0	0-0.02		0	0-0.01		0.8205	0.9999
	k__Bacteria;p__Proteobacteria;c__Gammaproteobacteria;o__Enterobacterales;f__Enterobacteriaceae;g__Other		0	0-0.04		0	0-0.01		0.9235	0.9999
	k__Bacteria;p__Proteobacteria;c__Gammaproteobacteria;o__Enterobacterales;f__Other;g__Other		0.02	0-0.07		0.04	0.02-0.04		0.0736	0.709041
	k__Bacteria;p__Proteobacteria;c__Gammaproteobacteria;o__Enterobacterales;f__Pasteurellaceae;g__Actinobacillus		0.01	0-0.05		0.02	0-0.03		0.41	0.9999
	k__Bacteria;p__Proteobacteria;c__Gammaproteobacteria;o__Enterobacterales;f__Pasteurellaceae;g__Aggregatibacter		0	0-0.2		0	0-0.02		0.3826	0.9999
	k__Bacteria;p__Proteobacteria;c__Gammaproteobacteria;o__Enterobacterales;f__Pasteurellaceae;g__Avibacterium		0	0-0.01		0	0-0.01		0.6489	0.9999
	k__Bacteria;p__Proteobacteria;c__Gammaproteobacteria;o__Enterobacterales;f__Pasteurellaceae;g__Basfia		0	0-0.01		0	0-0.01		0.0322	0.568867
	k__Bacteria;p__Proteobacteria;c__Gammaproteobacteria;o__Enterobacterales;f__Pasteurellaceae;g__Basfia_A		0.01	0-0.01		0.01	0-0.02		0.3909	0.9999
	k__Bacteria;p__Proteobacteria;c__Gammaproteobacteria;o__Enterobacterales;f__Pasteurellaceae;g__Bibersteinia		0	0-0.01		0.01	0-0.02		0.004	0.318
	k__Bacteria;p__Proteobacteria;c__Gammaproteobacteria;o__Enterobacterales;f__Pasteurellaceae;g__Frederiksenia		1.63	0.15-17.19		3.58	0.34-8.55		0.3651	0.9999
	k__Bacteria;p__Proteobacteria;c__Gammaproteobacteria;o__Enterobacterales;f__Pasteurellaceae;g__Gallibacterium		0	0-0.02		0	0-0.01		0.2575	0.909833
	k__Bacteria;p__Proteobacteria;c__Gammaproteobacteria;o__Enterobacterales;f__Pasteurellaceae;g__Glaesserella		0.02	0-0.13		0.04	0-0.08		0.229	0.888073
	k__Bacteria;p__Proteobacteria;c__Gammaproteobacteria;o__Enterobacterales;f__Pasteurellaceae;g__Haemophilus		0.01	0-0.5		0.01	0-0.03		0.3338	0.9999
	k__Bacteria;p__Proteobacteria;c__Gammaproteobacteria;o__Enterobacterales;f__Pasteurellaceae;g__Haemophilus_A		0.01	0-0.04		0	0-0.03		0.6233	0.9999
	k__Bacteria;p__Proteobacteria;c__Gammaproteobacteria;o__Enterobacterales;f__Pasteurellaceae;g__Haemophilus_D		0.01	0-1.38		0.01	0-0.04		0.6833	0.9999
	k__Bacteria;p__Proteobacteria;c__Gammaproteobacteria;o__Enterobacterales;f__Pasteurellaceae;g__Haemophilus_E		0	0-0.01		0	0-0.01		0.1285	0.709041
	k__Bacteria;p__Proteobacteria;c__Gammaproteobacteria;o__Enterobacterales;f__Pasteurellaceae;g__Histophilus		0.94	0.34-18.77		1.13	0.43-6.45		0.4727	0.9999
	k__Bacteria;p__Proteobacteria;c__Gammaproteobacteria;o__Enterobacterales;f__Pasteurellaceae;g__Mannheimia		0.01	0-0.03		0.01	0-0.03		0.1408	0.709041
	k__Bacteria;p__Proteobacteria;c__Gammaproteobacteria;o__Enterobacterales;f__Pasteurellaceae;g__Muribacter		0.01	0-0.03		0.01	0-0.01		0.4716	0.9999
	k__Bacteria;p__Proteobacteria;c__Gammaproteobacteria;o__Enterobacterales;f__Pasteurellaceae;g__Other		0.3	0.05-1.16		0.41	0.22-0.64		0.1824	0.795837
	k__Bacteria;p__Proteobacteria;c__Gammaproteobacteria;o__Enterobacterales;f__Pasteurellaceae;g__Pasteurella		2.73	0.49-20.99		3.64	1.84-10.09		0.1267	0.709041
	k__Bacteria;p__Proteobacteria;c__Gammaproteobacteria;o__Other;f__Other;g__Other		0.06	0.02-0.99		0.09	0.06-0.13		0.1121	0.709041
	k__Bacteria;p__Proteobacteria;c__Gammaproteobacteria;o__Pseudomonadales;f__Moraxellaceae;g__Acinetobacter		0.02	0-3.07		0.01	0-0.03		0.9165	0.9999
	k__Bacteria;p__Proteobacteria;c__Gammaproteobacteria;o__Pseudomonadales;f__Moraxellaceae;g__Moraxella		0.21	0.04-1.22		0.23	0.03-0.77		0.9999	0.9999
	k__Bacteria;p__Proteobacteria;c__Gammaproteobacteria;o__Pseudomonadales;f__Moraxellaceae;g__Moraxella_A		0.02	0-0.16		0.01	0-0.07		0.7031	0.9999
	k__Bacteria;p__Proteobacteria;c__Gammaproteobacteria;o__Pseudomonadales;f__Moraxellaceae;g__Moraxella_C		0	0-0.04		0	0-0.02		0.9999	0.9999
	k__Bacteria;p__Proteobacteria;c__Gammaproteobacteria;o__Pseudomonadales;f__Moraxellaceae;g__Other		0.05	0.01-0.12		0.05	0.02-0.14		0.7728	0.9999
	k__Bacteria;p__Proteobacteria;c__Gammaproteobacteria;o__Pseudomonadales;f__Moraxellaceae;g__Psychrobacter		0	0-3.16		0	0-0.03		0.7857	0.9999
	k__Bacteria;p__Proteobacteria;c__Gammaproteobacteria;o__Pseudomonadales;f__Other;g__Other		0	0-0.03		0	0-0		0.9646	0.9999
	k__Bacteria;p__Proteobacteria;c__Gammaproteobacteria;o__Xanthomonadales;f__Xanthomonadaceae;g__Other		0	0-0.01		0	0-0.02		0.7645	0.9999
	k__Bacteria;p__Proteobacteria;c__Gammaproteobacteria;o__Xanthomonadales;f__Xanthomonadaceae;g__Stenotrophomonas		0	0-0.01		0	0-0.01		0.4811	0.9999
	k__Bacteria;p__Proteobacteria;c__Other;o__Other;f__Other;g__Other		0	0-0.04		0.01	0-0.02		0.0072	0.3816
	k__Bacteria;p__Spirochaetota;c__Spirochaetia;o__Treponematales;f__Other;g__Other		0	0-0.01		0	0-0.01		0.9042	0.9999
	k__Bacteria;p__Spirochaetota;c__Spirochaetia;o__Treponematales;f__Treponemataceae;g__Other		0.01	0-0.05		0.01	0-0.01		0.537	0.9999
	k__Bacteria;p__Spirochaetota;c__Spirochaetia;o__Treponematales;f__Treponemataceae;g__Treponema		0.07	0-0.84		0.05	0.01-0.13		0.4797	0.9999
	k__Bacteria;p__Spirochaetota;c__Spirochaetia;o__Treponematales;f__Treponemataceae;g__Treponema_B		0.36	0.02-1.48		0.37	0.05-0.83		0.9516	0.9999
	k__Bacteria;p__Spirochaetota;c__Spirochaetia;o__Treponematales;f__Treponemataceae;g__Treponema_C		0.01	0-0.04		0.01	0-0.05		0.6341	0.9999
	k__Bacteria;p__Spirochaetota;c__Spirochaetia;o__Treponematales;f__Treponemataceae;g__Treponema_D		0.01	0-0.26		0	0-0.43		0.5499	0.9999
	Species		Healthy			Oral Tumor			Healthy vs. Oral Tumor
			Median	Range		Median	Range		P value	Q value
														*statistically non-significant
	k__Bacteria;p__Actinobacteriota;c__Actinomycetia;o__Actinomycetales;f__Actinomycetaceae;g__Actinomyces;s__Actinomyces_bowdenii_A		0.02	0-2.97		0.02	0-0.21		0.9357	0.9999
	k__Bacteria;p__Actinobacteriota;c__Actinomycetia;o__Actinomycetales;f__Actinomycetaceae;g__Actinomyces;s__Actinomyces_bowdenii_B		0.03	0-1.16		0.05	0-0.46		0.9355	0.9999
	k__Bacteria;p__Actinobacteriota;c__Actinomycetia;o__Actinomycetales;f__Actinomycetaceae;g__Actinomyces;s__Other		0.01	0-0.27		0.01	0-0.06		0.5218	0.9999
	k__Bacteria;p__Actinobacteriota;c__Actinomycetia;o__Actinomycetales;f__Actinomycetaceae;g__Actinomyces;s__[Actinomyces_GCF_016598775.1]		0.48	0-2.4		0.14	0.02-2.42		0.4443	0.9999
	k__Bacteria;p__Actinobacteriota;c__Actinomycetia;o__Actinomycetales;f__Actinomycetaceae;g__Buchananella;s__Buchananella_hordeovulneris		0.09	0-0.44		0.1	0.02-0.56		0.6213	0.9999
	k__Bacteria;p__Actinobacteriota;c__Actinomycetia;o__Actinomycetales;f__Actinomycetaceae;g__Gleimia;s__Gleimia_coleocanis		0.02	0-0.14		0.03	0-0.19		0.3959	0.9999
	k__Bacteria;p__Actinobacteriota;c__Actinomycetia;o__Actinomycetales;f__Actinomycetaceae;g__Other;s__Other		0	0-0.01		0	0-0.01		0.7429	0.9999
	k__Bacteria;p__Actinobacteriota;c__Actinomycetia;o__Actinomycetales;f__Actinomycetaceae;g__Pauljensenia;s__Other		0.01	0-0.04		0.01	0-0.01		0.8627	0.9999
	k__Bacteria;p__Actinobacteriota;c__Actinomycetia;o__Actinomycetales;f__Actinomycetaceae;g__Pauljensenia;s__Pauljensenia_vaccimaxillae		0	0-0.01		0	0-0.02		0.0413	0.923927
	k__Bacteria;p__Actinobacteriota;c__Actinomycetia;o__Actinomycetales;f__Microbacteriaceae;g__Other;s__Other		0	0-0.01		0	0-0.01		0.8373	0.9999
	k__Bacteria;p__Actinobacteriota;c__Actinomycetia;o__Actinomycetales;f__Other;g__Other;s__Other		0.01	0-0.27		0.01	0-0.02		0.1263	0.928484
	k__Bacteria;p__Actinobacteriota;c__Actinomycetia;o__Mycobacteriales;f__Mycobacteriaceae;g__Corynebacterium;s__Corynebacterium_canis		0.07	0-4.05		0.39	0-2.69		0.7675	0.9999
	k__Bacteria;p__Actinobacteriota;c__Actinomycetia;o__Mycobacteriales;f__Mycobacteriaceae;g__Corynebacterium;s__Corynebacterium_freiburgense		0.16	0-1.04		0.04	0-0.29		0.0469	0.923927
	k__Bacteria;p__Actinobacteriota;c__Actinomycetia;o__Mycobacteriales;f__Mycobacteriaceae;g__Corynebacterium;s__Corynebacterium_mustelae		0.09	0.01-4.69		0.15	0.01-0.66		0.6855	0.9999
	k__Bacteria;p__Actinobacteriota;c__Actinomycetia;o__Mycobacteriales;f__Mycobacteriaceae;g__Corynebacterium;s__Other		0.01	0-0.08		0	0-0.01		0.2744	0.9999
	k__Bacteria;p__Actinobacteriota;c__Actinomycetia;o__Other;f__Other;g__Other;s__Other		0.01	0-0.09		0.01	0.01-0.03		0.0996	0.928484
	k__Bacteria;p__Actinobacteriota;c__Actinomycetia;o__Propionibacteriales;f__Propionibacteriaceae;g__Arachnia;s__Arachnia_propionica		0	0-0.01		0	0-0.04		0.2588	0.9999
	k__Bacteria;p__Actinobacteriota;c__Actinomycetia;o__Propionibacteriales;f__Propionibacteriaceae;g__Arachnia;s__Other		0	0-0.01		0	0-0.01		0.1369	0.928484
	k__Bacteria;p__Actinobacteriota;c__Actinomycetia;o__Propionibacteriales;f__Propionibacteriaceae;g__Cutibacterium;s__Cutibacterium_acnes		0.02	0-5.54		0.01	0-0.04		0.4771	0.9999
	k__Bacteria;p__Actinobacteriota;c__Actinomycetia;o__Propionibacteriales;f__Propionibacteriaceae;g__Cutibacterium;s__Other		0	0-0.19		0	0-0		0.9027	0.9999
	k__Bacteria;p__Actinobacteriota;c__Actinomycetia;o__Propionibacteriales;f__Propionibacteriaceae;g__Other;s__Other		0	0-0.01		0	0-0.01		0.446	0.9999
	k__Bacteria;p__Bacteroidota;c__Bacteroidia;o__Bacteroidales;f__Bacteroidaceae;g__Alloprevotella;s__Alloprevotella_rava		0	0-0.02		0.01	0-0.01		0.7839	0.9999
	k__Bacteria;p__Bacteroidota;c__Bacteroidia;o__Bacteroidales;f__Bacteroidaceae;g__Alloprevotella;s__Alloprevotella_tannerae		0	0-0.02		0	0-0		0.1131	0.928484
	k__Bacteria;p__Bacteroidota;c__Bacteroidia;o__Bacteroidales;f__Bacteroidaceae;g__Bacteroides;s__Bacteroides_fragilis		0	0-1.05		0	0-0.02		0.5967	0.9999
	k__Bacteria;p__Bacteroidota;c__Bacteroidia;o__Bacteroidales;f__Bacteroidaceae;g__Bacteroides;s__Bacteroides_heparinolyticus		0.05	0-0.7		0	0-0.9		0.6028	0.9999
	k__Bacteria;p__Bacteroidota;c__Bacteroidia;o__Bacteroidales;f__Bacteroidaceae;g__Bacteroides;s__Bacteroides_pyogenes		0.02	0-4.29		0.02	0-0.6		0.5858	0.9999
	k__Bacteria;p__Bacteroidota;c__Bacteroidia;o__Bacteroidales;f__Bacteroidaceae;g__Bacteroides;s__Bacteroides_pyogenes_A		0.05	0-2.89		0.08	0.02-1.29		0.3344	0.9999
	k__Bacteria;p__Bacteroidota;c__Bacteroidia;o__Bacteroidales;f__Bacteroidaceae;g__Bacteroides;s__Bacteroides_zoogleoformans		0	0-0.03		0	0-0.04		0.8373	0.9999
	k__Bacteria;p__Bacteroidota;c__Bacteroidia;o__Bacteroidales;f__Bacteroidaceae;g__Bacteroides;s__Other		0.03	0-1.86		0.05	0.01-0.59		0.4237	0.9999
	k__Bacteria;p__Bacteroidota;c__Bacteroidia;o__Bacteroidales;f__Bacteroidaceae;g__F0040;s__F0040_sp000318095		0.02	0-0.13		0.01	0-0.09		0.448	0.9999
	k__Bacteria;p__Bacteroidota;c__Bacteroidia;o__Bacteroidales;f__Bacteroidaceae;g__Other;s__Other		0.11	0.01-0.26		0.1	0.06-0.45		0.6859	0.9999
	k__Bacteria;p__Bacteroidota;c__Bacteroidia;o__Bacteroidales;f__Bacteroidaceae;g__Phocaeicola;s__Other		0	0-0.01		0	0-0.01		0.6208	0.9999
	k__Bacteria;p__Bacteroidota;c__Bacteroidia;o__Bacteroidales;f__Bacteroidaceae;g__Phocaeicola;s__Phocaeicola_abscessus		0	0-0.02		0	0-0.01		0.9074	0.9999
	k__Bacteria;p__Bacteroidota;c__Bacteroidia;o__Bacteroidales;f__Bacteroidaceae;g__Prevotella;s__Other		0.11	0.01-0.22		0.12	0.02-0.24		0.451	0.9999
	k__Bacteria;p__Bacteroidota;c__Bacteroidia;o__Bacteroidales;f__Bacteroidaceae;g__Prevotella;s__Prevotella_baroniae		0	0-0.01		0	0-0.01		0.5965	0.9999
	k__Bacteria;p__Bacteroidota;c__Bacteroidia;o__Bacteroidales;f__Bacteroidaceae;g__Prevotella;s__Prevotella_bivia		0	0-0.03		0	0-0.01		0.1397	0.928484
	k__Bacteria;p__Bacteroidota;c__Bacteroidia;o__Bacteroidales;f__Bacteroidaceae;g__Prevotella;s__Prevotella_buccae		0	0-0.41		0	0-0.01		0.5144	0.9999
	k__Bacteria;p__Bacteroidota;c__Bacteroidia;o__Bacteroidales;f__Bacteroidaceae;g__Prevotella;s__Prevotella_buccalis		0	0-0.02		0	0-0.02		0.6478	0.9999
	k__Bacteria;p__Bacteroidota;c__Bacteroidia;o__Bacteroidales;f__Bacteroidaceae;g__Prevotella;s__Prevotella_conceptionensis		0	0-0.02		0	0-0.01		0.5389	0.9999
	k__Bacteria;p__Bacteroidota;c__Bacteroidia;o__Bacteroidales;f__Bacteroidaceae;g__Prevotella;s__Prevotella_copri		0	0-0.02		0	0-0.01		0.5504	0.9999
	k__Bacteria;p__Bacteroidota;c__Bacteroidia;o__Bacteroidales;f__Bacteroidaceae;g__Prevotella;s__Prevotella_dentasini		0.01	0-0.03		0.01	0-0.02		0.8058	0.9999
	k__Bacteria;p__Bacteroidota;c__Bacteroidia;o__Bacteroidales;f__Bacteroidaceae;g__Prevotella;s__Prevotella_falsenii		0	0-0.01		0	0-0.01		0.285	0.9999
	k__Bacteria;p__Bacteroidota;c__Bacteroidia;o__Bacteroidales;f__Bacteroidaceae;g__Prevotella;s__Prevotella_intermedia		0.05	0.01-0.33		0.05	0.01-0.15		0.9448	0.9999
	k__Bacteria;p__Bacteroidota;c__Bacteroidia;o__Bacteroidales;f__Bacteroidaceae;g__Prevotella;s__Prevotella_maculosa		0	0-0.01		0	0-0.01		0.1637	0.959282
	k__Bacteria;p__Bacteroidota;c__Bacteroidia;o__Bacteroidales;f__Bacteroidaceae;g__Prevotella;s__Prevotella_nigrescens		0	0-0.06		0	0-0.01		0.7237	0.9999
	k__Bacteria;p__Bacteroidota;c__Bacteroidia;o__Bacteroidales;f__Bacteroidaceae;g__Prevotella;s__Prevotella_oris		0.01	0-0.06		0.01	0-0.02		0.8465	0.9999
	k__Bacteria;p__Bacteroidota;c__Bacteroidia;o__Bacteroidales;f__Bacteroidaceae;g__Prevotella;s__Prevotella_oulorum		0	0-0.02		0.01	0-0.06		0.0712	0.928484
	k__Bacteria;p__Bacteroidota;c__Bacteroidia;o__Bacteroidales;f__Bacteroidaceae;g__Prevotella;s__Prevotella_saccharolytica		0.01	0-0.04		0.01	0.01-0.01		0.3435	0.9999
	k__Bacteria;p__Bacteroidota;c__Bacteroidia;o__Bacteroidales;f__Bacteroidaceae;g__Prevotella;s__Prevotella_seregens		0	0-0.02		0	0-0.01		0.5193	0.9999
	k__Bacteria;p__Bacteroidota;c__Bacteroidia;o__Bacteroidales;f__Bacteroidaceae;g__Prevotella;s__Prevotella_sp000467895		0	0-0.01		0.01	0-0.02		0.011	0.537167
	k__Bacteria;p__Bacteroidota;c__Bacteroidia;o__Bacteroidales;f__Dysgonomonadaceae;g__Fermentimonas;s__Fermentimonas_caenicola		0	0-0.07		0	0-0.04		0.8965	0.9999
	k__Bacteria;p__Bacteroidota;c__Bacteroidia;o__Bacteroidales;f__Other;g__Other;s__Other		0.54	0.1-1.54		0.67	0.37-0.85		0.9448	0.9999
	k__Bacteria;p__Bacteroidota;c__Bacteroidia;o__Bacteroidales;f__Porphyromonadaceae;g__Other;s__Other		0.47	0.04-0.83		0.38	0.24-0.63		0.8807	0.9999
	k__Bacteria;p__Bacteroidota;c__Bacteroidia;o__Bacteroidales;f__Porphyromonadaceae;g__Porphyromonas;s__Other		0.71	0.1-2.82		0.84	0.25-1.35		0.9448	0.9999
	k__Bacteria;p__Bacteroidota;c__Bacteroidia;o__Bacteroidales;f__Porphyromonadaceae;g__Porphyromonas;s__Porphyromonas_catoniae		0.02	0-0.19		0.01	0-0.06		0.917	0.9999
	k__Bacteria;p__Bacteroidota;c__Bacteroidia;o__Bacteroidales;f__Porphyromonadaceae;g__Porphyromonas;s__Porphyromonas_circumdentaria		0.14	0.02-0.24		0.17	0.03-0.23		0.335	0.9999
	k__Bacteria;p__Bacteroidota;c__Bacteroidia;o__Bacteroidales;f__Porphyromonadaceae;g__Porphyromonas;s__Porphyromonas_crevioricanis		0.57	0.01-4.04		1.07	0.02-4.06		0.764	0.9999
	k__Bacteria;p__Bacteroidota;c__Bacteroidia;o__Bacteroidales;f__Porphyromonadaceae;g__Porphyromonas;s__Porphyromonas_endodontalis		0.02	0-0.03		0.01	0-0.02		0.3102	0.9999
	k__Bacteria;p__Bacteroidota;c__Bacteroidia;o__Bacteroidales;f__Porphyromonadaceae;g__Porphyromonas;s__Porphyromonas_gingivalis		0.79	0.13-3.13		0.76	0.39-1.25		0.9727	0.9999
	k__Bacteria;p__Bacteroidota;c__Bacteroidia;o__Bacteroidales;f__Porphyromonadaceae;g__Porphyromonas;s__Porphyromonas_gingivicanis		3.98	0.12-13.22		4.49	2.4-20.2		0.417	0.9999
	k__Bacteria;p__Bacteroidota;c__Bacteroidia;o__Bacteroidales;f__Porphyromonadaceae;g__Porphyromonas;s__Porphyromonas_gulae		10.86	0.35-50.73		14.13	0.94-21.03		0.764	0.9999
	k__Bacteria;p__Bacteroidota;c__Bacteroidia;o__Bacteroidales;f__Porphyromonadaceae;g__Porphyromonas;s__Porphyromonas_macacae		0.06	0-0.76		0.02	0.01-3.71		0.7547	0.9999
	k__Bacteria;p__Bacteroidota;c__Bacteroidia;o__Bacteroidales;f__Porphyromonadaceae;g__Porphyromonas;s__Porphyromonas_pasteri		0.01	0-0.32		0.01	0-0.02		0.6519	0.9999
	k__Bacteria;p__Bacteroidota;c__Bacteroidia;o__Bacteroidales;f__Porphyromonadaceae;g__Porphyromonas_A;s__Other		0.05	0-0.2		0.04	0.03-0.17		0.8444	0.9999
	k__Bacteria;p__Bacteroidota;c__Bacteroidia;o__Bacteroidales;f__Porphyromonadaceae;g__Porphyromonas_A;s__Porphyromonas_A_cangingivalis		15.87	4.88-31.34		16.22	7.36-28.24		0.6273	0.9999
	k__Bacteria;p__Bacteroidota;c__Bacteroidia;o__Bacteroidales;f__Porphyromonadaceae;g__Porphyromonas_A;s__Porphyromonas_A_canoris		4.05	0.51-23.85		9.48	0.5-14.38		0.9081	0.9999
	k__Bacteria;p__Bacteroidota;c__Bacteroidia;o__Bacteroidales;f__Porphyromonadaceae;g__Porphyromonas_A;s__Porphyromonas_A_levii		0.01	0-0.03		0	0-0.03		0.2166	0.9999
	k__Bacteria;p__Bacteroidota;c__Bacteroidia;o__Bacteroidales;f__Porphyromonadaceae;g__Porphyromonas_A;s__Porphyromonas_A_somerae		0	0-0.01		0	0-0.01		0.0924	0.928484
	k__Bacteria;p__Bacteroidota;c__Bacteroidia;o__Bacteroidales;f__Tannerellaceae;g__Parabacteroides;s__Other		0	0-0		0	0-0		0.7081	0.9999
	k__Bacteria;p__Bacteroidota;c__Bacteroidia;o__Bacteroidales;f__Tannerellaceae;g__Parabacteroides;s__Parabacteroides_distasonis		0	0-0.01		0	0-0		0.6603	0.9999
	k__Bacteria;p__Bacteroidota;c__Bacteroidia;o__Bacteroidales;f__Tannerellaceae;g__Parabacteroides;s__Parabacteroides_merdae		0	0-0.01		0	0-0.01		0.6273	0.9999
	k__Bacteria;p__Bacteroidota;c__Bacteroidia;o__Bacteroidales;f__Tannerellaceae;g__Tannerella;s__Tannerella_forsythia		0.31	0.04-0.93		0.34	0.1-0.88		0.9013	0.9999
	k__Bacteria;p__Bacteroidota;c__Bacteroidia;o__Flavobacteriales;f__Flavobacteriaceae;g__Capnocytophaga;s__Capnocytophaga_canimorsus		1.26	0.16-9.23		1.41	0.45-6.96		0.8717	0.9999
	k__Bacteria;p__Bacteroidota;c__Bacteroidia;o__Flavobacteriales;f__Flavobacteriaceae;g__Capnocytophaga;s__Capnocytophaga_canis		1.08	0.39-5.48		1.19	0.31-11.04		0.9448	0.9999
	k__Bacteria;p__Bacteroidota;c__Bacteroidia;o__Flavobacteriales;f__Flavobacteriaceae;g__Capnocytophaga;s__Capnocytophaga_cynodegmi		1.3	0.16-7.64		1.3	0.26-3.33		0.6273	0.9999
	k__Bacteria;p__Bacteroidota;c__Bacteroidia;o__Flavobacteriales;f__Flavobacteriaceae;g__Capnocytophaga;s__Capnocytophaga_stomatis		0.04	0.01-3.18		0.04	0.01-0.14		0.5393	0.9999
	k__Bacteria;p__Bacteroidota;c__Bacteroidia;o__Flavobacteriales;f__Flavobacteriaceae;g__Capnocytophaga;s__Other		0.48	0.08-2.03		0.35	0.11-1.74		0.764	0.9999
	k__Bacteria;p__Bacteroidota;c__Bacteroidia;o__Flavobacteriales;f__Flavobacteriaceae;g__Other;s__Other		0.01	0-0.05		0.01	0-0.05		0.7706	0.9999
	k__Bacteria;p__Bacteroidota;c__Bacteroidia;o__Flavobacteriales;f__Other;g__Other;s__Other		0.05	0.01-0.48		0.08	0.01-0.23		0.2481	0.9999
	k__Bacteria;p__Bacteroidota;c__Bacteroidia;o__Flavobacteriales;f__Weeksellaceae;g__Bergeyella;s__Bergeyella_zoohelcum		1.01	0.09-18.49		6.4	0.2-9.4		0.0473	0.923927
	k__Bacteria;p__Bacteroidota;c__Bacteroidia;o__Flavobacteriales;f__Weeksellaceae;g__Chryseobacterium;s__Chryseobacterium_gallinarum		0	0-0.01		0	0-0		0.296	0.9999
	k__Bacteria;p__Bacteroidota;c__Bacteroidia;o__Flavobacteriales;f__Weeksellaceae;g__Chryseobacterium;s__Other		0	0-0		0	0-0.01		0.3758	0.9999
	k__Bacteria;p__Bacteroidota;c__Bacteroidia;o__Flavobacteriales;f__Weeksellaceae;g__Other;s__Other		0.01	0-0.04		0.02	0-0.03		0.1035	0.928484
	k__Bacteria;p__Bacteroidota;c__Bacteroidia;o__Flavobacteriales;f__Weeksellaceae;g__Riemerella;s__Riemerella_anatipestifer		0	0-0		0	0-0.01		0.0033	0.390667
	k__Bacteria;p__Bacteroidota;c__Bacteroidia;o__Flavobacteriales;f__Weeksellaceae;g__Riemerella;s__Riemerella_columbipharyngis		0	0-0.01		0	0-0.03		0.1166	0.928484
	k__Bacteria;p__Bacteroidota;c__Bacteroidia;o__Other;f__Other;g__Other;s__Other		0.04	0.01-0.1		0.05	0.02-0.06		0.7549	0.9999
	k__Bacteria;p__Campylobacterota;c__Campylobacteria;o__Campylobacterales;f__Arcobacteraceae;g__Aliarcobacter;s__Aliarcobacter_cibarius		0	0-0.02		0	0-0.01		0.3609	0.9999
	k__Bacteria;p__Campylobacterota;c__Campylobacteria;o__Campylobacterales;f__Arcobacteraceae;g__Aliarcobacter;s__Other		0	0-0.12		0.02	0-0.16		0.6933	0.9999
	k__Bacteria;p__Campylobacterota;c__Campylobacteria;o__Campylobacterales;f__Arcobacteraceae;g__Other;s__Other		0	0-0.03		0	0-0.05		0.3144	0.9999
	k__Bacteria;p__Campylobacterota;c__Campylobacteria;o__Campylobacterales;f__Campylobacteraceae;g__Campylobacter;s__Other		0.01	0-0.03		0.01	0-0.01		0.3809	0.9999
	k__Bacteria;p__Campylobacterota;c__Campylobacteria;o__Campylobacterales;f__Campylobacteraceae;g__Campylobacter_A;s__Campylobacter_A_concisus_R		0	0-0.03		0	0-0.02		0.5558	0.9999
	k__Bacteria;p__Campylobacterota;c__Campylobacteria;o__Campylobacterales;f__Campylobacteraceae;g__Campylobacter_A;s__Campylobacter_A_curvus		0.01	0-0.04		0.01	0-0.01		0.6151	0.9999
	k__Bacteria;p__Campylobacterota;c__Campylobacteria;o__Campylobacterales;f__Campylobacteraceae;g__Campylobacter_A;s__Campylobacter_A_mucosalis		0.01	0-0.02		0.01	0-0.01		0.6648	0.9999
	k__Bacteria;p__Campylobacterota;c__Campylobacteria;o__Campylobacterales;f__Campylobacteraceae;g__Campylobacter_A;s__Campylobacter_A_rectus		0.02	0-2.18		0.02	0-0.47		0.9171	0.9999
	k__Bacteria;p__Campylobacterota;c__Campylobacteria;o__Campylobacterales;f__Campylobacteraceae;g__Campylobacter_A;s__Other		0.04	0-0.17		0.04	0.01-0.08		0.755	0.9999
	k__Bacteria;p__Campylobacterota;c__Campylobacteria;o__Campylobacterales;f__Campylobacteraceae;g__Campylobacter_D;s__Other		0	0-0.01		0	0-0.01		0.9999	0.9999
	k__Bacteria;p__Campylobacterota;c__Campylobacteria;o__Campylobacterales;f__Campylobacteraceae;g__Other;s__Other		0.02	0-0.1		0.02	0-0.06		0.6022	0.9999
	k__Bacteria;p__Campylobacterota;c__Campylobacteria;o__Campylobacterales;f__Helicobacteraceae;g__Other;s__Other		0	0-0.06		0.01	0-0.04		0.456	0.9999
	k__Bacteria;p__Campylobacterota;c__Campylobacteria;o__Campylobacterales;f__Helicobacteraceae;g__Wolinella;s__Wolinella_succinogenes		0.01	0-0.16		0.01	0-0.07		0.6998	0.9999
	k__Bacteria;p__Campylobacterota;c__Campylobacteria;o__Campylobacterales;f__Other;g__Other;s__Other		0.01	0-0.03		0	0-0.02		0.7548	0.9999
	k__Bacteria;p__Desulfobacterota;c__Desulfovibrionia;o__Desulfovibrionales;f__Desulfomicrobiaceae;g__Desulfomicrobium;s__Desulfomicrobium_orale		0.8	0.13-4.3		0.58	0.2-6.67		0.6544	0.9999
	k__Bacteria;p__Desulfobacterota;c__Desulfovibrionia;o__Desulfovibrionales;f__Desulfomicrobiaceae;g__Desulfomicrobium;s__Other		0	0-0.01		0	0-0.01		0.8769	0.9999
	k__Bacteria;p__Desulfobacterota;c__Desulfovibrionia;o__Desulfovibrionales;f__Desulfovibrionaceae;g__Desulfovibrio;s__Other		0	0-0.02		0	0-0.01		0.5131	0.9999
	k__Bacteria;p__Desulfobacterota;c__Desulfovibrionia;o__Desulfovibrionales;f__Desulfovibrionaceae;g__Other;s__Other		0	0-0.01		0	0-0.01		0.4993	0.9999
	k__Bacteria;p__Desulfobacterota;c__Desulfovibrionia;o__Desulfovibrionales;f__Other;g__Other;s__Other		0	0-0.02		0	0-0.01		0.6724	0.9999
	k__Bacteria;p__Desulfobacterota;c__Other;o__Other;f__Other;g__Other;s__Other		0	0-0.03		0	0-0.03		0.6442	0.9999
	k__Bacteria;p__Firmicutes;c__Bacilli;o__Acholeplasmatales;f__Acholeplasmataceae;g__Acholeplasma;s__Other		0	0-0.01		0	0-0		0.9656	0.9999
	k__Bacteria;p__Firmicutes;c__Bacilli;o__Acholeplasmatales;f__Other;g__Other;s__Other		0	0-0.02		0	0-0.01		0.452	0.9999
	k__Bacteria;p__Firmicutes;c__Bacilli;o__Erysipelotrichales;f__Erysipelatoclostridiaceae;g__Eggerthia;s__Eggerthia_catenaformis		0.01	0-0.02		0	0-0.01		0.2416	0.9999
	k__Bacteria;p__Firmicutes;c__Bacilli;o__Erysipelotrichales;f__Erysipelotrichaceae;g__Other;s__Other		0	0-0.01		0	0-0		0.1203	0.928484
	k__Bacteria;p__Firmicutes;c__Bacilli;o__Lactobacillales;f__Aerococcaceae;g__Abiotrophia;s__Other		0	0-0.02		0	0-0		0.9847	0.9999
	k__Bacteria;p__Firmicutes;c__Bacilli;o__Lactobacillales;f__Aerococcaceae;g__Granulicatella;s__Other		0	0-0.01		0	0-0.01		0.3747	0.9999
	k__Bacteria;p__Firmicutes;c__Bacilli;o__Lactobacillales;f__Aerococcaceae;g__Other;s__Other		0	0-0.02		0	0-0.01		0.4909	0.9999
	k__Bacteria;p__Firmicutes;c__Bacilli;o__Lactobacillales;f__Lactobacillaceae;g__Weissella;s__Weissella_confusa		0	0-0.02		0	0-0.02		0.3936	0.9999
	k__Bacteria;p__Firmicutes;c__Bacilli;o__Lactobacillales;f__Other;g__Other;s__Other		0	0-0.02		0	0-0.01		0.7174	0.9999
	k__Bacteria;p__Firmicutes;c__Bacilli;o__Lactobacillales;f__Streptococcaceae;g__Other;s__Other		0	0-0		0	0-0		0.0619	0.928484
	k__Bacteria;p__Firmicutes;c__Bacilli;o__Lactobacillales;f__Streptococcaceae;g__Streptococcus;s__Other		0.04	0-4.67		0.02	0.01-0.12		0.3339	0.9999
	k__Bacteria;p__Firmicutes;c__Bacilli;o__Lactobacillales;f__Streptococcaceae;g__Streptococcus;s__Streptococcus_anginosus		0	0-0.02		0	0-0.01		0.7576	0.9999
	k__Bacteria;p__Firmicutes;c__Bacilli;o__Lactobacillales;f__Streptococcaceae;g__Streptococcus;s__Streptococcus_caballi		0	0-0.02		0	0-0.01		0.9693	0.9999
	k__Bacteria;p__Firmicutes;c__Bacilli;o__Lactobacillales;f__Streptococcaceae;g__Streptococcus;s__Streptococcus_constellatus		0	0-0.02		0	0-0.01		0.694	0.9999
	k__Bacteria;p__Firmicutes;c__Bacilli;o__Lactobacillales;f__Streptococcaceae;g__Streptococcus;s__Streptococcus_equi		0.01	0-0.05		0.01	0-0.01		0.4777	0.9999
	k__Bacteria;p__Firmicutes;c__Bacilli;o__Lactobacillales;f__Streptococcaceae;g__Streptococcus;s__Streptococcus_intermedius		0	0-0.02		0	0-0		0.2716	0.9999
	k__Bacteria;p__Firmicutes;c__Bacilli;o__Lactobacillales;f__Streptococcaceae;g__Streptococcus;s__Streptococcus_minor		0.06	0.01-2		0.16	0-1.17		0.5396	0.9999
	k__Bacteria;p__Firmicutes;c__Bacilli;o__Lactobacillales;f__Streptococcaceae;g__Streptococcus;s__Streptococcus_suis		0	0-0.02		0	0-0.01		0.6296	0.9999
	k__Bacteria;p__Firmicutes;c__Bacilli;o__Mycoplasmatales;f__Metamycoplasmataceae;g__Mesomycoplasma;s__Mesomycoplasma_molare		0.02	0-1.26		0	0-1.62		0.3662	0.9999
	k__Bacteria;p__Firmicutes;c__Bacilli;o__Mycoplasmatales;f__Metamycoplasmataceae;g__Metamycoplasma;s__Other		0	0-0.02		0	0-0.03		0.9685	0.9999
	k__Bacteria;p__Firmicutes;c__Bacilli;o__Mycoplasmatales;f__Metamycoplasmataceae;g__Mycoplasmopsis;s__Other		0	0-0.03		0	0-0.03		0.1729	0.961848
	k__Bacteria;p__Firmicutes;c__Bacilli;o__Mycoplasmatales;f__Metamycoplasmataceae;g__Mycoplasmopsis_A;s__Mycoplasmopsis_A_canis		0.3	0.02-3.83		0.23	0-2.97		0.7929	0.9999
	k__Bacteria;p__Firmicutes;c__Bacilli;o__Mycoplasmatales;f__Metamycoplasmataceae;g__Mycoplasmopsis_A;s__Mycoplasmopsis_A_cynos		0	0-0.03		0	0-0.01		0.6811	0.9999
	k__Bacteria;p__Firmicutes;c__Bacilli;o__Mycoplasmatales;f__Metamycoplasmataceae;g__Mycoplasmopsis_A;s__Other		0.01	0-0.19		0.02	0-0.12		0.538	0.9999
	k__Bacteria;p__Firmicutes;c__Bacilli;o__Mycoplasmatales;f__Metamycoplasmataceae;g__Other;s__Other		0	0-0.08		0.01	0-0.05		0.467	0.9999
	k__Bacteria;p__Firmicutes;c__Bacilli;o__Mycoplasmatales;f__Mycoplasmoidaceae;g__Ureaplasma;s__Other		0.01	0-0.15		0	0-0.05		0.1958	0.972363
	k__Bacteria;p__Firmicutes;c__Bacilli;o__Other;f__Other;g__Other;s__Other		0.01	0-0.02		0.01	0-0.02		0.3783	0.9999
	k__Bacteria;p__Firmicutes;c__Bacilli;o__Staphylococcales;f__Gemellaceae;g__Gemella;s__Gemella_palaticanis		0.06	0.01-0.67		0.06	0.02-0.11		0.5865	0.9999
	k__Bacteria;p__Firmicutes;c__Bacilli;o__Staphylococcales;f__Gemellaceae;g__Gemella;s__Other		0	0-0.06		0	0-0.01		0.0986	0.928484
	k__Bacteria;p__Firmicutes_A;c__Clostridia;o__Lachnospirales;f__Lachnospiraceae;g__Blautia_A;s__Other		0	0-0		0	0-0		0.3346	0.9999
	k__Bacteria;p__Firmicutes_A;c__Clostridia;o__Lachnospirales;f__Lachnospiraceae;g__Catonella;s__Catonella_morbi		0	0-0.02		0	0-0.02		0.1902	0.961848
	k__Bacteria;p__Firmicutes_A;c__Clostridia;o__Lachnospirales;f__Lachnospiraceae;g__Johnsonella;s__Johnsonella_ignava		0	0-0.02		0	0-0.02		0.9358	0.9999
	k__Bacteria;p__Firmicutes_A;c__Clostridia;o__Lachnospirales;f__Lachnospiraceae;g__Lachnoanaerobaculum;s__Lachnoanaerobaculum_orale		0	0-0.01		0	0-0		0.301	0.9999
	k__Bacteria;p__Firmicutes_A;c__Clostridia;o__Lachnospirales;f__Lachnospiraceae;g__Lachnoanaerobaculum;s__Lachnoanaerobaculum_saburreum		0	0-0.01		0	0-0.01		0.5626	0.9999
	k__Bacteria;p__Firmicutes_A;c__Clostridia;o__Lachnospirales;f__Lachnospiraceae;g__Lachnoanaerobaculum;s__Lachnoanaerobaculum_sp000296385		0	0-0.01		0	0-0.01		0.4572	0.9999
	k__Bacteria;p__Firmicutes_A;c__Clostridia;o__Lachnospirales;f__Lachnospiraceae;g__Oribacterium;s__Oribacterium_asaccharolyticum		0	0-0.01		0	0-0.01		0.566	0.9999
	k__Bacteria;p__Firmicutes_A;c__Clostridia;o__Lachnospirales;f__Lachnospiraceae;g__Other;s__Other		0.01	0-0.03		0.01	0-0.03		0.7375	0.9999
	k__Bacteria;p__Firmicutes_A;c__Clostridia;o__Lachnospirales;f__Lachnospiraceae;g__Stomatobaculum;s__Stomatobaculum_naviforme		0	0-0.01		0	0-0.02		0.7328	0.9999
	k__Bacteria;p__Firmicutes_A;c__Clostridia;o__Other;f__Other;g__Other;s__Other		0.03	0.01-0.05		0.03	0.01-0.04		0.8625	0.9999
	k__Bacteria;p__Firmicutes_A;c__Clostridia;o__Peptostreptococcales;f__Anaerovoracaceae;g__Mogibacterium;s__Mogibacterium_timidum		0	0-0.03		0	0-0.01		0.3721	0.9999
	k__Bacteria;p__Firmicutes_A;c__Clostridia;o__Peptostreptococcales;f__Anaerovoracaceae;g__Other;s__Other		0	0-0.01		0	0-0		0.9042	0.9999
	k__Bacteria;p__Firmicutes_A;c__Clostridia;o__Peptostreptococcales;f__Filifactoraceae;g__Acetoanaerobium;s__Acetoanaerobium_sticklandii		0	0-0.01		0	0-0.01		0.5076	0.9999
	k__Bacteria;p__Firmicutes_A;c__Clostridia;o__Peptostreptococcales;f__Filifactoraceae;g__Criibacterium;s__Criibacterium_bergeronii		0.01	0-0.01		0	0-0.01		0.6319	0.9999
	k__Bacteria;p__Firmicutes_A;c__Clostridia;o__Peptostreptococcales;f__Filifactoraceae;g__Filifactor;s__Filifactor_alocis		0.08	0-0.29		0.08	0.04-0.29		0.7029	0.9999
	k__Bacteria;p__Firmicutes_A;c__Clostridia;o__Peptostreptococcales;f__Filifactoraceae;g__Peptoanaerobacter;s__Peptoanaerobacter_stomatis		0.02	0-0.06		0.01	0-0.03		0.2282	0.9999
	k__Bacteria;p__Firmicutes_A;c__Clostridia;o__Peptostreptococcales;f__Other;g__Other;s__Other		0.01	0-0.01		0.01	0-0.01		0.7711	0.9999
	k__Bacteria;p__Firmicutes_A;c__Clostridia;o__Peptostreptococcales;f__Peptostreptococcaceae;g__Other;s__Other		0	0-0.01		0	0-0		0.8778	0.9999
	k__Bacteria;p__Firmicutes_A;c__Clostridia;o__Peptostreptococcales;f__Peptostreptococcaceae;g__Peptostreptococcus;s__Peptostreptococcus_anaerobius		0	0-0.02		0	0-0.01		0.3615	0.9999
	k__Bacteria;p__Firmicutes_A;c__Clostridia;o__Peptostreptococcales;f__Peptostreptococcaceae;g__Peptostreptococcus;s__Peptostreptococcus_canis		0.05	0-0.4		0.06	0.01-0.28		0.7728	0.9999
	k__Bacteria;p__Firmicutes_A;c__Clostridia;o__Peptostreptococcales;f__Peptostreptococcaceae;g__Peptostreptococcus;s__Peptostreptococcus_stomatis		0	0-0.03		0	0-0		0.0924	0.928484
	k__Bacteria;p__Firmicutes_A;c__Clostridia;o__Tissierellales;f__Peptoniphilaceae;g__Anaerosphaera;s__Anaerosphaera_mikwangii		0.01	0-0.24		0.02	0-0.02		0.8979	0.9999
	k__Bacteria;p__Firmicutes_A;c__Clostridia;o__Tissierellales;f__Peptoniphilaceae;g__Other;s__Other		0.01	0-0.03		0.01	0-0.01		0.9586	0.9999
	k__Bacteria;p__Firmicutes_A;c__Clostridia;o__Tissierellales;f__Peptoniphilaceae;g__Parvimonas;s__Other		0	0-0.01		0	0-0		0.0878	0.928484
	k__Bacteria;p__Firmicutes_A;c__Clostridia;o__Tissierellales;f__Peptoniphilaceae;g__Parvimonas;s__Parvimonas_micra		0.01	0-0.06		0	0-0.02		0.0964	0.928484
	k__Bacteria;p__Firmicutes_A;c__Clostridia;o__Tissierellales;f__Peptoniphilaceae;g__Peptoniphilus;s__Peptoniphilus_indolicus		0.01	0-0.03		0.01	0-0.02		0.5188	0.9999
	k__Bacteria;p__Firmicutes_C;c__Negativicutes;o__Veillonellales;f__Megasphaeraceae;g__28L;s__28L_sp002892445		0	0-0.01		0	0-0.01		0.2759	0.9999
	k__Bacteria;p__Fusobacteriota;c__Fusobacteriia;o__Fusobacteriales;f__Fusobacteriaceae;g__Fusobacterium;s__Fusobacterium_canifelinum		0.02	0-0.12		0.04	0-0.09		0.9539	0.9999
	k__Bacteria;p__Fusobacteriota;c__Fusobacteriia;o__Fusobacteriales;f__Fusobacteriaceae;g__Fusobacterium;s__Fusobacterium_massiliense		0	0-0.02		0	0-0		0.1553	0.947977
	k__Bacteria;p__Fusobacteriota;c__Fusobacteriia;o__Fusobacteriales;f__Fusobacteriaceae;g__Fusobacterium;s__Fusobacterium_nucleatum		0	0-0.02		0	0-0.01		0.3757	0.9999
	k__Bacteria;p__Fusobacteriota;c__Fusobacteriia;o__Fusobacteriales;f__Fusobacteriaceae;g__Fusobacterium;s__Fusobacterium_polymorphum		0	0-0.02		0	0-0.01		0.9246	0.9999
	k__Bacteria;p__Fusobacteriota;c__Fusobacteriia;o__Fusobacteriales;f__Fusobacteriaceae;g__Fusobacterium;s__Fusobacterium_russii		0.06	0-0.19		0.03	0-0.12		0.1065	0.928484
	k__Bacteria;p__Fusobacteriota;c__Fusobacteriia;o__Fusobacteriales;f__Fusobacteriaceae;g__Fusobacterium;s__Fusobacterium_vincentii		0	0-0.01		0	0-0		0.3999	0.9999
	k__Bacteria;p__Fusobacteriota;c__Fusobacteriia;o__Fusobacteriales;f__Fusobacteriaceae;g__Fusobacterium;s__Other		0.07	0-0.18		0.03	0.01-0.14		0.6191	0.9999
	k__Bacteria;p__Fusobacteriota;c__Fusobacteriia;o__Fusobacteriales;f__Fusobacteriaceae;g__Fusobacterium_A;s__Other		0	0-0.01		0	0-0		0.0219	0.676564
	k__Bacteria;p__Fusobacteriota;c__Fusobacteriia;o__Fusobacteriales;f__Fusobacteriaceae;g__Fusobacterium_C;s__Fusobacterium_C_necrophorum		0.02	0-0.04		0.02	0-0.03		0.6829	0.9999
	k__Bacteria;p__Fusobacteriota;c__Fusobacteriia;o__Fusobacteriales;f__Fusobacteriaceae;g__Other;s__Other		0	0-0.01		0	0-0		0.0319	0.778892
	k__Bacteria;p__Fusobacteriota;c__Fusobacteriia;o__Fusobacteriales;f__Leptotrichiaceae;g__Other;s__Other		0	0-0.04		0	0-0		0.1217	0.928484
	k__Bacteria;p__Fusobacteriota;c__Fusobacteriia;o__Fusobacteriales;f__Leptotrichiaceae;g__Streptobacillus;s__Other		0	0-0.06		0	0-0		0.0586	0.928484
	k__Bacteria;p__Fusobacteriota;c__Fusobacteriia;o__Fusobacteriales;f__Leptotrichiaceae;g__Streptobacillus;s__Streptobacillus_felis		0	0-0.06		0	0-0		0.0026	0.390667
	k__Bacteria;p__Fusobacteriota;c__Fusobacteriia;o__Fusobacteriales;f__Other;g__Other;s__Other		0	0-0		0	0-0		0.0908	0.928484
	k__Bacteria;p__Other;c__Other;o__Other;f__Other;g__Other;s__Other		0.2	0.09-5.57		0.26	0.21-0.58		0.1359	0.928484
	k__Bacteria;p__Patescibacteria;c__Saccharimonadia;o__Saccharimonadales;f__Saccharimonadaceae;g__TM7x;s__TM7x_sp000803625		0.04	0-0.16		0.03	0-0.09		0.6682	0.9999
	k__Bacteria;p__Proteobacteria;c__Alphaproteobacteria;o__Rhodobacterales;f__Rhodobacteraceae;g__Roseovarius;s__Roseovarius_nitratireducens		0	0-0.01		0	0-0		0.6283	0.9999
	k__Bacteria;p__Proteobacteria;c__Gammaproteobacteria;o__Burkholderiales;f__Burkholderiaceae;g__Lampropedia;s__Lampropedia_cohaerens		0	0-0.02		0	0-0.01		0.8782	0.9999
	k__Bacteria;p__Proteobacteria;c__Gammaproteobacteria;o__Burkholderiales;f__Burkholderiaceae;g__Lampropedia;s__Other		0	0-0.01		0	0-0.02		0.7694	0.9999
	k__Bacteria;p__Proteobacteria;c__Gammaproteobacteria;o__Burkholderiales;f__Burkholderiaceae;g__Lautropia;s__Lautropia_mirabilis		0	0-0.06		0	0-0.02		0.4822	0.9999
	k__Bacteria;p__Proteobacteria;c__Gammaproteobacteria;o__Burkholderiales;f__Burkholderiaceae;g__Other;s__Other		0.02	0-0.07		0.02	0.01-0.04		0.808	0.9999
	k__Bacteria;p__Proteobacteria;c__Gammaproteobacteria;o__Burkholderiales;f__Burkholderiaceae;g__Ottowia;s__Ottowia_sp001262075		0	0-0.03		0	0-0.01		0.6108	0.9999
	k__Bacteria;p__Proteobacteria;c__Gammaproteobacteria;o__Burkholderiales;f__Neisseriaceae;g__Alysiella;s__Alysiella_crassa		0	0-0.02		0.01	0-0.01		0.4244	0.9999
	k__Bacteria;p__Proteobacteria;c__Gammaproteobacteria;o__Burkholderiales;f__Neisseriaceae;g__Alysiella;s__Alysiella_filiformis		0	0-0.02		0	0-0.01		0.532	0.9999
	k__Bacteria;p__Proteobacteria;c__Gammaproteobacteria;o__Burkholderiales;f__Neisseriaceae;g__Alysiella;s__Other		0	0-0.02		0.01	0-0.02		0.0254	0.676564
	k__Bacteria;p__Proteobacteria;c__Gammaproteobacteria;o__Burkholderiales;f__Neisseriaceae;g__Conchiformibius;s__Conchiformibius_kuhniae		0.01	0-0.12		0.02	0.01-0.05		0.3828	0.9999
	k__Bacteria;p__Proteobacteria;c__Gammaproteobacteria;o__Burkholderiales;f__Neisseriaceae;g__Conchiformibius;s__Conchiformibius_steedae		6.18	0.65-40.44		10.97	3.49-22.48		0.295	0.9999
	k__Bacteria;p__Proteobacteria;c__Gammaproteobacteria;o__Burkholderiales;f__Neisseriaceae;g__Conchiformibius;s__Other		0.02	0-0.14		0.04	0.01-0.07		0.3339	0.9999
	k__Bacteria;p__Proteobacteria;c__Gammaproteobacteria;o__Burkholderiales;f__Neisseriaceae;g__Eikenella;s__Eikenella_corrodens		0	0-0.06		0	0-0.09		0.2213	0.9999
	k__Bacteria;p__Proteobacteria;c__Gammaproteobacteria;o__Burkholderiales;f__Neisseriaceae;g__Eikenella;s__Eikenella_shayeganii		0.37	0.07-3.2		0.26	0.02-1.62		0.2342	0.9999
	k__Bacteria;p__Proteobacteria;c__Gammaproteobacteria;o__Burkholderiales;f__Neisseriaceae;g__Kingella_A;s__Kingella_A_denitrificans		0	0-0.02		0.01	0-0.02		0.022	0.676564
	k__Bacteria;p__Proteobacteria;c__Gammaproteobacteria;o__Burkholderiales;f__Neisseriaceae;g__Neisseria;s__Neisseria_animaloris		0.5	0.07-13.69		0.18	0.05-0.82		0.137	0.928484
	k__Bacteria;p__Proteobacteria;c__Gammaproteobacteria;o__Burkholderiales;f__Neisseriaceae;g__Neisseria;s__Neisseria_arctica		0	0-0.03		0	0-0.01		0.6875	0.9999
	k__Bacteria;p__Proteobacteria;c__Gammaproteobacteria;o__Burkholderiales;f__Neisseriaceae;g__Neisseria;s__Neisseria_canis		0.23	0.01-1.95		0.13	0.02-1.91		0.1424	0.928484
	k__Bacteria;p__Proteobacteria;c__Gammaproteobacteria;o__Burkholderiales;f__Neisseriaceae;g__Neisseria;s__Neisseria_chenwenguii		0	0-0.01		0	0-0.01		0.817	0.9999
	k__Bacteria;p__Proteobacteria;c__Gammaproteobacteria;o__Burkholderiales;f__Neisseriaceae;g__Neisseria;s__Neisseria_elongata		0	0-0.04		0	0-0.01		0.5316	0.9999
	k__Bacteria;p__Proteobacteria;c__Gammaproteobacteria;o__Burkholderiales;f__Neisseriaceae;g__Neisseria;s__Neisseria_wadsworthii		0.04	0-0.35		0.02	0-0.13		0.1011	0.928484
	k__Bacteria;p__Proteobacteria;c__Gammaproteobacteria;o__Burkholderiales;f__Neisseriaceae;g__Neisseria;s__Neisseria_weaveri		1.88	0.08-9.48		0.88	0.08-7.94		0.3651	0.9999
	k__Bacteria;p__Proteobacteria;c__Gammaproteobacteria;o__Burkholderiales;f__Neisseriaceae;g__Neisseria;s__Neisseria_zoodegmatis		0.81	0.06-7.05		0.47	0.05-0.99		0.1527	0.947977
	k__Bacteria;p__Proteobacteria;c__Gammaproteobacteria;o__Burkholderiales;f__Neisseriaceae;g__Neisseria;s__Other		0.45	0.02-2.77		0.2	0.07-0.71		0.115	0.928484
	k__Bacteria;p__Proteobacteria;c__Gammaproteobacteria;o__Burkholderiales;f__Neisseriaceae;g__Other;s__Other		0.14	0.01-0.53		0.15	0.11-0.21		0.8263	0.9999
	k__Bacteria;p__Proteobacteria;c__Gammaproteobacteria;o__Burkholderiales;f__Neisseriaceae;g__Vitreoscilla;s__Vitreoscilla_massiliensis		0	0-0		0	0-0		0.3009	0.9999
	k__Bacteria;p__Proteobacteria;c__Gammaproteobacteria;o__Burkholderiales;f__Other;g__Other;s__Other		0.01	0-0.04		0.02	0.01-0.04		0.1682	0.961848
	k__Bacteria;p__Proteobacteria;c__Gammaproteobacteria;o__Cardiobacteriales;f__Cardiobacteriaceae;g__Cardiobacterium;s__Cardiobacterium_hominis		0	0-0.01		0	0-0.01		0.4226	0.9999
	k__Bacteria;p__Proteobacteria;c__Gammaproteobacteria;o__Cardiobacteriales;f__Cardiobacteriaceae;g__Dichelobacter;s__Dichelobacter_nodosus		0	0-0.01		0	0-0.01		0.581	0.9999
	k__Bacteria;p__Proteobacteria;c__Gammaproteobacteria;o__Cardiobacteriales;f__Cardiobacteriaceae;g__Other;s__Other		0	0-0.02		0	0-0.01		0.8205	0.9999
	k__Bacteria;p__Proteobacteria;c__Gammaproteobacteria;o__Enterobacterales;f__Enterobacteriaceae;g__Other;s__Other		0	0-0.04		0	0-0.01		0.9235	0.9999
	k__Bacteria;p__Proteobacteria;c__Gammaproteobacteria;o__Enterobacterales;f__Other;g__Other;s__Other		0.02	0-0.07		0.04	0.02-0.04		0.0736	0.928484
	k__Bacteria;p__Proteobacteria;c__Gammaproteobacteria;o__Enterobacterales;f__Pasteurellaceae;g__Actinobacillus;s__Actinobacillus_equuli		0	0-0.01		0	0-0		0.1504	0.947977
	k__Bacteria;p__Proteobacteria;c__Gammaproteobacteria;o__Enterobacterales;f__Pasteurellaceae;g__Actinobacillus;s__Actinobacillus_lignieresii		0	0-0.02		0	0-0.01		0.9953	0.9999
	k__Bacteria;p__Proteobacteria;c__Gammaproteobacteria;o__Enterobacterales;f__Pasteurellaceae;g__Actinobacillus;s__Actinobacillus_ureae		0	0-0.01		0	0-0.01		0.6926	0.9999
	k__Bacteria;p__Proteobacteria;c__Gammaproteobacteria;o__Enterobacterales;f__Pasteurellaceae;g__Actinobacillus;s__Other		0	0-0.04		0.01	0-0.02		0.1228	0.928484
	k__Bacteria;p__Proteobacteria;c__Gammaproteobacteria;o__Enterobacterales;f__Pasteurellaceae;g__Aggregatibacter;s__Other		0	0-0.01		0	0-0		0.3722	0.9999
	k__Bacteria;p__Proteobacteria;c__Gammaproteobacteria;o__Enterobacterales;f__Pasteurellaceae;g__Avibacterium;s__Avibacterium_endocarditidis		0	0-0		0	0-0.01		0.643	0.9999
	k__Bacteria;p__Proteobacteria;c__Gammaproteobacteria;o__Enterobacterales;f__Pasteurellaceae;g__Basfia;s__Basfia_bettyae		0	0-0.01		0	0-0.01		0.3233	0.9999
	k__Bacteria;p__Proteobacteria;c__Gammaproteobacteria;o__Enterobacterales;f__Pasteurellaceae;g__Basfia_A;s__Basfia_A_porcinus		0	0-0.01		0	0-0.02		0.8392	0.9999
	k__Bacteria;p__Proteobacteria;c__Gammaproteobacteria;o__Enterobacterales;f__Pasteurellaceae;g__Basfia_A;s__Basfia_A_succinogenes		0	0-0		0	0-0		0.0558	0.928484
	k__Bacteria;p__Proteobacteria;c__Gammaproteobacteria;o__Enterobacterales;f__Pasteurellaceae;g__Bibersteinia;s__Bibersteinia_trehalosi		0	0-0.01		0.01	0-0.02		0.004	0.390667
	k__Bacteria;p__Proteobacteria;c__Gammaproteobacteria;o__Enterobacterales;f__Pasteurellaceae;g__Frederiksenia;s__Frederiksenia_canicola		1.63	0.15-17.19		3.58	0.34-8.55		0.3651	0.9999
	k__Bacteria;p__Proteobacteria;c__Gammaproteobacteria;o__Enterobacterales;f__Pasteurellaceae;g__Gallibacterium;s__Gallibacterium_anatis		0	0-0.02		0	0-0.01		0.2575	0.9999
	k__Bacteria;p__Proteobacteria;c__Gammaproteobacteria;o__Enterobacterales;f__Pasteurellaceae;g__Glaesserella;s__Glaesserella_parasuis		0.02	0-0.13		0.04	0-0.08		0.229	0.9999
	k__Bacteria;p__Proteobacteria;c__Gammaproteobacteria;o__Enterobacterales;f__Pasteurellaceae;g__Haemophilus;s__Haemophilus_haemolyticus		0	0-0.13		0	0-0		0.735	0.9999
	k__Bacteria;p__Proteobacteria;c__Gammaproteobacteria;o__Enterobacterales;f__Pasteurellaceae;g__Haemophilus;s__Haemophilus_influenzae		0	0-0.03		0	0-0.01		0.6637	0.9999
	k__Bacteria;p__Proteobacteria;c__Gammaproteobacteria;o__Enterobacterales;f__Pasteurellaceae;g__Haemophilus;s__Other		0	0-0.16		0	0-0.01		0.5553	0.9999
	k__Bacteria;p__Proteobacteria;c__Gammaproteobacteria;o__Enterobacterales;f__Pasteurellaceae;g__Haemophilus_A;s__Haemophilus_A_paraphrohaemolyticus		0	0-0.04		0	0-0.01		0.2906	0.9999
	k__Bacteria;p__Proteobacteria;c__Gammaproteobacteria;o__Enterobacterales;f__Pasteurellaceae;g__Haemophilus_A;s__Haemophilus_A_sputorum		0	0-0.01		0	0-0.01		0.1828	0.961848
	k__Bacteria;p__Proteobacteria;c__Gammaproteobacteria;o__Enterobacterales;f__Pasteurellaceae;g__Haemophilus_A;s__Other		0	0-0.01		0	0-0.01		0.025	0.676564
	k__Bacteria;p__Proteobacteria;c__Gammaproteobacteria;o__Enterobacterales;f__Pasteurellaceae;g__Haemophilus_D;s__Haemophilus_D_parainfluenzae		0	0-0.48		0	0-0		0.9825	0.9999
	k__Bacteria;p__Proteobacteria;c__Gammaproteobacteria;o__Enterobacterales;f__Pasteurellaceae;g__Haemophilus_D;s__Other		0	0-0.49		0	0-0.01		0.5163	0.9999
	k__Bacteria;p__Proteobacteria;c__Gammaproteobacteria;o__Enterobacterales;f__Pasteurellaceae;g__Haemophilus_E;s__Haemophilus_E_paracuniculus		0	0-0.01		0	0-0.01		0.1285	0.928484
	k__Bacteria;p__Proteobacteria;c__Gammaproteobacteria;o__Enterobacterales;f__Pasteurellaceae;g__Histophilus;s__Histophilus_haemoglobinophilus		0.91	0.32-18.57		1.1	0.42-6.37		0.4779	0.9999
	k__Bacteria;p__Proteobacteria;c__Gammaproteobacteria;o__Enterobacterales;f__Pasteurellaceae;g__Histophilus;s__Histophilus_somni		0.02	0-0.17		0.03	0.01-0.07		0.4648	0.9999
	k__Bacteria;p__Proteobacteria;c__Gammaproteobacteria;o__Enterobacterales;f__Pasteurellaceae;g__Histophilus;s__Other		0.01	0-0.04		0	0-0.01		0.863	0.9999
	k__Bacteria;p__Proteobacteria;c__Gammaproteobacteria;o__Enterobacterales;f__Pasteurellaceae;g__Mannheimia;s__Mannheimia_granulomatis		0	0-0.01		0	0-0.01		0.2295	0.9999
	k__Bacteria;p__Proteobacteria;c__Gammaproteobacteria;o__Enterobacterales;f__Pasteurellaceae;g__Mannheimia;s__Mannheimia_haemolytica		0	0-0.01		0	0-0		0.6207	0.9999
	k__Bacteria;p__Proteobacteria;c__Gammaproteobacteria;o__Enterobacterales;f__Pasteurellaceae;g__Mannheimia;s__Mannheimia_sp000521605		0	0-0.01		0.01	0-0.01		0.0083	0.48638
	k__Bacteria;p__Proteobacteria;c__Gammaproteobacteria;o__Enterobacterales;f__Pasteurellaceae;g__Mannheimia;s__Mannheimia_varigena		0.01	0-0.01		0	0-0.01		0.9791	0.9999
	k__Bacteria;p__Proteobacteria;c__Gammaproteobacteria;o__Enterobacterales;f__Pasteurellaceae;g__Muribacter;s__Muribacter_muris		0.01	0-0.03		0.01	0-0.01		0.4716	0.9999
	k__Bacteria;p__Proteobacteria;c__Gammaproteobacteria;o__Enterobacterales;f__Pasteurellaceae;g__Other;s__Other		0.3	0.05-1.16		0.41	0.22-0.64		0.1824	0.961848
	k__Bacteria;p__Proteobacteria;c__Gammaproteobacteria;o__Enterobacterales;f__Pasteurellaceae;g__Pasteurella;s__Other		0.06	0.02-0.66		0.11	0.06-0.3		0.1637	0.959282
	k__Bacteria;p__Proteobacteria;c__Gammaproteobacteria;o__Enterobacterales;f__Pasteurellaceae;g__Pasteurella;s__Pasteurella_canis		0.59	0.13-2.21		1.37	0.46-5.86		0.0194	0.676564
	k__Bacteria;p__Proteobacteria;c__Gammaproteobacteria;o__Enterobacterales;f__Pasteurellaceae;g__Pasteurella;s__Pasteurella_dagmatis		0.91	0.02-17.3		0.4	0.19-3.86		0.2342	0.9999
	k__Bacteria;p__Proteobacteria;c__Gammaproteobacteria;o__Enterobacterales;f__Pasteurellaceae;g__Pasteurella;s__Pasteurella_multocida		0.01	0-0.48		0.04	0.01-0.16		0.2987	0.9999
	k__Bacteria;p__Proteobacteria;c__Gammaproteobacteria;o__Enterobacterales;f__Pasteurellaceae;g__Pasteurella;s__Pasteurella_multocida_A		0.55	0.01-3.16		1.02	0.02-5.49		0.2159	0.9999
	k__Bacteria;p__Proteobacteria;c__Gammaproteobacteria;o__Enterobacterales;f__Pasteurellaceae;g__Pasteurella;s__Pasteurella_multocida_D		0	0-0.02		0	0-0.01		0.5224	0.9999
	k__Bacteria;p__Proteobacteria;c__Gammaproteobacteria;o__Other;f__Other;g__Other;s__Other		0.06	0.02-0.99		0.09	0.06-0.13		0.1121	0.928484
	k__Bacteria;p__Proteobacteria;c__Gammaproteobacteria;o__Pseudomonadales;f__Moraxellaceae;g__Acinetobacter;s__Other		0.01	0-0.05		0.01	0-0.03		0.8435	0.9999
	k__Bacteria;p__Proteobacteria;c__Gammaproteobacteria;o__Pseudomonadales;f__Moraxellaceae;g__Moraxella;s__Moraxella_bovis		0	0-0.06		0	0-0.01		0.1839	0.961848
	k__Bacteria;p__Proteobacteria;c__Gammaproteobacteria;o__Pseudomonadales;f__Moraxellaceae;g__Moraxella;s__Moraxella_bovoculi		0	0-0.01		0	0-0.03		0.7767	0.9999
	k__Bacteria;p__Proteobacteria;c__Gammaproteobacteria;o__Pseudomonadales;f__Moraxellaceae;g__Moraxella;s__Moraxella_canis		0.05	0.01-0.87		0.05	0.01-0.17		0.5863	0.9999
	k__Bacteria;p__Proteobacteria;c__Gammaproteobacteria;o__Pseudomonadales;f__Moraxellaceae;g__Moraxella;s__Moraxella_caprae		0	0-0.01		0	0-0.02		0.9999	0.9999
	k__Bacteria;p__Proteobacteria;c__Gammaproteobacteria;o__Pseudomonadales;f__Moraxellaceae;g__Moraxella;s__Moraxella_catarrhalis		0.01	0-0.04		0.01	0-0.04		0.3809	0.9999
	k__Bacteria;p__Proteobacteria;c__Gammaproteobacteria;o__Pseudomonadales;f__Moraxellaceae;g__Moraxella;s__Moraxella_caviae		0.01	0-0.03		0.01	0-0.03		0.6336	0.9999
	k__Bacteria;p__Proteobacteria;c__Gammaproteobacteria;o__Pseudomonadales;f__Moraxellaceae;g__Moraxella;s__Moraxella_cuniculi		0.01	0-0.03		0	0-0.03		0.6332	0.9999
	k__Bacteria;p__Proteobacteria;c__Gammaproteobacteria;o__Pseudomonadales;f__Moraxellaceae;g__Moraxella;s__Moraxella_equi		0	0-0.02		0	0-0.04		0.9999	0.9999
	k__Bacteria;p__Proteobacteria;c__Gammaproteobacteria;o__Pseudomonadales;f__Moraxellaceae;g__Moraxella;s__Moraxella_lacunata		0	0-0.02		0.01	0-0.03		0.27	0.9999
	k__Bacteria;p__Proteobacteria;c__Gammaproteobacteria;o__Pseudomonadales;f__Moraxellaceae;g__Moraxella;s__Moraxella_nonliquefaciens		0	0-0.02		0.01	0-0.02		0.8055	0.9999
	k__Bacteria;p__Proteobacteria;c__Gammaproteobacteria;o__Pseudomonadales;f__Moraxellaceae;g__Moraxella;s__Moraxella_oblonga		0	0-0.01		0.01	0-0.02		0.5263	0.9999
	k__Bacteria;p__Proteobacteria;c__Gammaproteobacteria;o__Pseudomonadales;f__Moraxellaceae;g__Moraxella;s__Moraxella_ovis		0	0-0.32		0.01	0-0.07		0.6985	0.9999
	k__Bacteria;p__Proteobacteria;c__Gammaproteobacteria;o__Pseudomonadales;f__Moraxellaceae;g__Moraxella;s__Moraxella_pluranimalium		0	0-0.01		0	0-0.01		0.4081	0.9999
	k__Bacteria;p__Proteobacteria;c__Gammaproteobacteria;o__Pseudomonadales;f__Moraxellaceae;g__Moraxella;s__Moraxella_porci		0	0-0.03		0	0-0.01		0.3992	0.9999
	k__Bacteria;p__Proteobacteria;c__Gammaproteobacteria;o__Pseudomonadales;f__Moraxellaceae;g__Moraxella;s__Other		0.09	0.03-0.29		0.12	0.01-0.31		0.7377	0.9999
	k__Bacteria;p__Proteobacteria;c__Gammaproteobacteria;o__Pseudomonadales;f__Moraxellaceae;g__Moraxella_A;s__Moraxella_A_atlantae		0	0-0.05		0	0-0.02		0.9926	0.9999
	k__Bacteria;p__Proteobacteria;c__Gammaproteobacteria;o__Pseudomonadales;f__Moraxellaceae;g__Moraxella_A;s__Moraxella_A_boevrei		0	0-0.03		0	0-0.02		0.9519	0.9999
	k__Bacteria;p__Proteobacteria;c__Gammaproteobacteria;o__Pseudomonadales;f__Moraxellaceae;g__Moraxella_A;s__Moraxella_A_macacae		0	0-0.01		0	0-0.01		0.9407	0.9999
	k__Bacteria;p__Proteobacteria;c__Gammaproteobacteria;o__Pseudomonadales;f__Moraxellaceae;g__Moraxella_A;s__Moraxella_A_osloensis		0	0-0.03		0	0-0.01		0.1904	0.961848
	k__Bacteria;p__Proteobacteria;c__Gammaproteobacteria;o__Pseudomonadales;f__Moraxellaceae;g__Moraxella_A;s__Other		0.01	0-0.06		0.01	0-0.02		0.9347	0.9999
	k__Bacteria;p__Proteobacteria;c__Gammaproteobacteria;o__Pseudomonadales;f__Moraxellaceae;g__Moraxella_C;s__Moraxella_C_lincolnii		0	0-0.04		0	0-0.02		0.9999	0.9999
	k__Bacteria;p__Proteobacteria;c__Gammaproteobacteria;o__Pseudomonadales;f__Moraxellaceae;g__Other;s__Other		0.05	0.01-0.12		0.05	0.02-0.14		0.7728	0.9999
	k__Bacteria;p__Proteobacteria;c__Gammaproteobacteria;o__Pseudomonadales;f__Moraxellaceae;g__Psychrobacter;s__Other		0	0-0.19		0	0-0.01		0.9944	0.9999
	k__Bacteria;p__Proteobacteria;c__Gammaproteobacteria;o__Pseudomonadales;f__Other;g__Other;s__Other		0	0-0.03		0	0-0		0.9646	0.9999
	k__Bacteria;p__Proteobacteria;c__Gammaproteobacteria;o__Xanthomonadales;f__Xanthomonadaceae;g__Other;s__Other		0	0-0.01		0	0-0.02		0.7645	0.9999
	k__Bacteria;p__Proteobacteria;c__Other;o__Other;f__Other;g__Other;s__Other		0	0-0.04		0.01	0-0.02		0.0072	0.48638
	k__Bacteria;p__Spirochaetota;c__Spirochaetia;o__Treponematales;f__Other;g__Other;s__Other		0	0-0.01		0	0-0.01		0.9042	0.9999
	k__Bacteria;p__Spirochaetota;c__Spirochaetia;o__Treponematales;f__Treponemataceae;g__Other;s__Other		0.01	0-0.05		0.01	0-0.01		0.537	0.9999
	k__Bacteria;p__Spirochaetota;c__Spirochaetia;o__Treponematales;f__Treponemataceae;g__Treponema;s__Other		0.01	0-0.12		0.01	0-0.03		0.3702	0.9999
	k__Bacteria;p__Spirochaetota;c__Spirochaetia;o__Treponematales;f__Treponemataceae;g__Treponema;s__Treponema_medium		0.01	0-0.42		0.01	0-0.03		0.5235	0.9999
	k__Bacteria;p__Spirochaetota;c__Spirochaetia;o__Treponematales;f__Treponemataceae;g__Treponema;s__Treponema_phagedenis		0	0-0.03		0.01	0-0.03		0.6815	0.9999
	k__Bacteria;p__Spirochaetota;c__Spirochaetia;o__Treponematales;f__Treponemataceae;g__Treponema;s__Treponema_sp000775995		0.01	0-0.21		0.01	0-0.02		0.5695	0.9999
	k__Bacteria;p__Spirochaetota;c__Spirochaetia;o__Treponematales;f__Treponemataceae;g__Treponema;s__Treponema_vincentii		0.01	0-0.09		0.01	0-0.04		0.6343	0.9999
	k__Bacteria;p__Spirochaetota;c__Spirochaetia;o__Treponematales;f__Treponemataceae;g__Treponema_B;s__Other		0.11	0.01-0.39		0.12	0.02-0.25		0.9747	0.9999
	k__Bacteria;p__Spirochaetota;c__Spirochaetia;o__Treponematales;f__Treponemataceae;g__Treponema_B;s__Treponema_B_denticola		0.17	0.01-0.79		0.2	0.02-0.43		0.8082	0.9999
	k__Bacteria;p__Spirochaetota;c__Spirochaetia;o__Treponematales;f__Treponemataceae;g__Treponema_B;s__Treponema_B_denticola_A		0.04	0-0.17		0.04	0.01-0.11		0.8988	0.9999
	k__Bacteria;p__Spirochaetota;c__Spirochaetia;o__Treponematales;f__Treponemataceae;g__Treponema_B;s__Treponema_B_pedis		0.01	0-0.03		0.01	0-0.03		0.6154	0.9999
	k__Bacteria;p__Spirochaetota;c__Spirochaetia;o__Treponematales;f__Treponemataceae;g__Treponema_B;s__Treponema_B_putidum		0.03	0-0.12		0.02	0-0.04		0.8262	0.9999
	k__Bacteria;p__Spirochaetota;c__Spirochaetia;o__Treponematales;f__Treponemataceae;g__Treponema_C;s__Other		0	0-0.01		0	0-0.01		0.9185	0.9999
	k__Bacteria;p__Spirochaetota;c__Spirochaetia;o__Treponematales;f__Treponemataceae;g__Treponema_C;s__Treponema_C_lecithinolyticum		0	0-0.02		0	0-0.01		0.1781	0.961848
	k__Bacteria;p__Spirochaetota;c__Spirochaetia;o__Treponematales;f__Treponemataceae;g__Treponema_C;s__Treponema_C_maltophilum		0.01	0-0.03		0.01	0-0.05		0.6656	0.9999
	k__Bacteria;p__Spirochaetota;c__Spirochaetia;o__Treponematales;f__Treponemataceae;g__Treponema_D;s__Other		0	0-0.1		0	0-0.05		0.9516	0.9999
	k__Bacteria;p__Spirochaetota;c__Spirochaetia;o__Treponematales;f__Treponemataceae;g__Treponema_D;s__[Treponema_D_GCF_017893965.1]		0	0-0.08		0	0-0.08		0.624	0.9999
	k__Bacteria;p__Spirochaetota;c__Spirochaetia;o__Treponematales;f__Treponemataceae;g__Treponema_D;s__[Treponema_D_GCF_017893985.1]		0	0-0.04		0	0-0.01		0.1426	0.928484
